# Supplementary material for: Comparisons of bond valences and distances for CO- and N2-bound clusters of FeMo-cofactors
Source: Royal Society of Chemistry journal article supplement (doi:10.1039/d2nj00754a), 2022-01-01
Supplement: d2nj00754a1.pdf [file d2nj00754a1.pdf]

## Supporting information

### Comparisons of bond valences and distances for CO- and N<sub>2</sub>-bound clusters of FeMo-cofactors

Chang Yuan<sup>a</sup>, Wan-Ting Jin<sup>a</sup>, and Zhao-Hui Zhou<sup>\*a</sup>

<sup>a</sup> State Key Laboratory of Physical Chemistry of Solid Surfaces, College of Chemistry and Chemical Engineering, Xiamen University, Xiamen 361005, People's Republic of China.

\*E-mail: zhzhou@xmu.edu.cn.

#### Figure and Table Options

|                                                                                                                                                                                                  |    |
|--------------------------------------------------------------------------------------------------------------------------------------------------------------------------------------------------|----|
| <b>Table S1</b> The bond valence analyses for irons in FeMo-cofactor (1) from MoFe protein 3U7Q which perform the most accurate structure with resolution of 1.00 Å. ....                        | 3  |
| <b>Table S2</b> The bond valence analyses for irons in FeMo-cofactor (2) from MoFe protein 3U7Q which perform the most accurate structure with resolution of 1.00 Å. ....                        | 5  |
| <b>Table S3</b> The bond valence analyses for irons in FeMo-cofactor (1) from MoFe protein 4TKV which coordinated with single CO between Fe2 and Fe6 with resolution of 1.50 Å. ....             | 7  |
| <b>Table S4</b> The bond valence analyses for irons in FeMo-cofactor (2) from MoFe protein 4TKV which coordinated with single CO between Fe2 and Fe6 with resolution of 1.50 Å. ....             | 9  |
| <b>Table S5</b> The bond valence analyses for irons in FeMo-cofactor (1) from MoFe protein 7JRF which coordinated with double CO on Fe6 with resolution of 1.33 Å. ....                          | 11 |
| <b>Table S6</b> The bond valence analyses for irons in FeMo-cofactor (2) from MoFe protein 7JRF which coordinated with double CO on Fe6 with resolution of 1.33 Å. ....                          | 13 |
| <b>Table S7</b> The bond valence analyses for irons in FeMo-cofactor (1) from MoFe protein 6UG0 which coordinated with single N <sub>2</sub> between Fe2 and Fe6 with resolution of 1.83 Å. .... | 15 |
| <b>Table S8</b> The bond valence analyses for irons in FeMo-cofactor (2) from MoFe protein 6UG0 which coordinated with double N <sub>2</sub> with resolution of 1.83 Å. ....                     | 17 |
| <b>Table S9</b> The bond valence analyses for irons in FeMo-cofactor (1) from MoFe protein 6UG0 with single N <sub>2</sub> refined as S atom with resolution of 1.83 Å. ....                     | 19 |
| <b>Table S10</b> The bond valence analyses for irons in FeMo-cofactor (2) from MoFe protein 6UG0 with double N <sub>2</sub> refined as S atoms with resolution of 1.83 Å. ....                   | 21 |
| <b>Table S11</b> The bond valence analyses for Mo atom in FeMo-cofactor (1) from MoFe protein 3U7Q with resolution of 1.00 Å. ....                                                               | 23 |

|                                                                                                                                                                                                                                  |    |
|----------------------------------------------------------------------------------------------------------------------------------------------------------------------------------------------------------------------------------|----|
| <b>Table S12</b> The bond valence analyses for Mo atom in FeMo-cofactor (2) from MoFe protein 3U7Q with resolution of 1.00 Å. ....                                                                                               | 24 |
| <b>Table S13</b> The bond valence analyses for Mo atom in FeMo-cofactor (1) from MoFe protein 4TKV with resolution of 1.50 Å. ....                                                                                               | 25 |
| <b>Table S14</b> The bond valence analyses for Mo atom in FeMo-cofactor (2) from MoFe protein 4TKV with resolution of 1.50 Å. ....                                                                                               | 26 |
| <b>Table S15</b> The bond valence analyses for Mo atom in FeMo-cofactor (1) from MoFe protein 7JRF with resolution of 1.33 Å. ....                                                                                               | 27 |
| <b>Table S16</b> The bond valence analyses for Mo atom in FeMo-cofactor (2) from MoFe protein 7JRF with resolution of 1.33 Å. ....                                                                                               | 28 |
| <b>Table S17</b> The bond valence analyses for Mo atom in single N <sub>2</sub> -bound FeMo-cofactor (1) from MoFe protein 6UG0 with resolution of 1.83 Å. The valences in bracket are not included in valence sum. ....         | 29 |
| <b>Table S18</b> The bond valence analyses for Mo atom in double N <sub>2</sub> -bound FeMo-cofactor (2) from MoFe protein 6UG0 with resolution of 1.83 Å. The valences in bracket are not included in valence sum. ....         | 30 |
| <b>Table S19</b> The bond valence analyses for Mo atom in FeMo-cofactor (1) from MoFe protein 6UG0 with single N <sub>2</sub> refined as S atom with resolution of 1.83 Å. ....                                                  | 31 |
| <b>Table S20</b> The bond valence analyses for Mo atom in FeMo-cofactor (2) from MoFe protein 6UG0 with double N <sub>2</sub> refined as S atoms with resolution of 1.83 Å. ....                                                 | 32 |
| <b>Table S21</b> The assumed bond valence analyses of Mo atom in 6UG0 if we replace the Mo–O distances by the corresponding bond distances of FeMo-cofactors in 3U7Q、4TKV、7JRF、1H1L and Mo <sup>3+</sup> inorganic complex. .... | 33 |
| <b>Table S22</b> The Mo–O ( $\alpha$ -alkoxy/ $\alpha$ -hydroxy) and Mo–O ( $\alpha$ -carboxy) distances (Å) of molybdenum $\alpha$ -hydroxycarboxylate complexes for Mo <sup>n+</sup> –O linear fitting. ....                   | 36 |
| <b>Figure S1</b> Plot and linear fit of average Mo <sup>n+</sup> –O ( $\alpha$ -alkoxy and $\alpha$ -carboxy) bond distances in molybdenum $\alpha$ -hydroxycarboxylates. ....                                                   | 40 |
| <b>References</b> . ....                                                                                                                                                                                                         | 41 |

**Table S1** The bond valence analyses for irons in FeMo-cofactor (1) from MoFe protein 3U7Q which perform the most accurate structure with resolution of 1.00 Å.

| Bond                  | $r_{ij}$ (Å) | $R_0$ (Å) | B (Å) | Bval  | Sum          | Diff.                 | $R_0$ (Å) | B (Å) | Bval  | Sum          | Diff.  |
|-----------------------|--------------|-----------|-------|-------|--------------|-----------------------|-----------|-------|-------|--------------|--------|
| expected valence = +2 |              |           |       |       |              | expected valence = +3 |           |       |       |              |        |
| Fe1–S1A               | 2.306        | 2.120     | 0.370 | 0.605 |              |                       | 2.149     | 0.370 | 0.654 |              |        |
| Fe1–S2A               | 2.270        | 2.120     | 0.370 | 0.667 |              |                       | 2.149     | 0.370 | 0.721 |              |        |
| Fe1–S4A               | 2.289        | 2.120     | 0.370 | 0.633 |              |                       | 2.149     | 0.370 | 0.685 |              |        |
| Fe1–SG                | 2.265        | 2.120     | 0.370 | 0.676 | 2.581        | 0.581                 | 2.149     | 0.370 | 0.731 | <b>2.791</b> | -0.209 |
| Fe2–S1A               | 2.263        | 2.120     | 0.370 | 0.679 |              |                       | 2.149     | 0.370 | 0.735 |              |        |
| Fe2–S2A               | 2.246        | 2.120     | 0.370 | 0.711 |              |                       | 2.149     | 0.370 | 0.769 |              |        |
| Fe2–S2B               | 2.198        | 2.120     | 0.370 | 0.810 |              |                       | 2.149     | 0.370 | 0.876 |              |        |
| Fe2–CX                | 2.014        | 1.650     | 0.370 | 0.374 | 2.575        | 0.575                 | 1.689     | 0.370 | 0.415 | <b>2.796</b> | -0.204 |
| Fe3–S2A               | 2.267        | 2.120     | 0.370 | 0.672 |              |                       | 2.149     | 0.370 | 0.727 |              |        |
| Fe3–S4A               | 2.251        | 2.120     | 0.370 | 0.702 |              |                       | 2.149     | 0.370 | 0.759 |              |        |
| Fe3–S5A               | 2.229        | 2.120     | 0.370 | 0.745 |              |                       | 2.149     | 0.370 | 0.806 |              |        |
| Fe3–CX                | 1.990        | 1.650     | 0.370 | 0.399 | 2.518        | 0.518                 | 1.689     | 0.370 | 0.443 | <b>2.735</b> | -0.265 |
| Fe4–S1A               | 2.286        | 2.120     | 0.370 | 0.638 |              |                       | 2.149     | 0.370 | 0.691 |              |        |
| Fe4–S3A               | 2.240        | 2.120     | 0.370 | 0.723 |              |                       | 2.149     | 0.370 | 0.782 |              |        |
| Fe4–S4A               | 2.286        | 2.120     | 0.370 | 0.638 |              |                       | 2.149     | 0.370 | 0.691 |              |        |
| Fe4–CX                | 2.003        | 1.650     | 0.370 | 0.385 | <b>2.385</b> | 0.385                 | 1.689     | 0.370 | 0.428 | 2.591        | -0.409 |

|         |       |       |       |       |       |       |       |       |       |              |        |
|---------|-------|-------|-------|-------|-------|-------|-------|-------|-------|--------------|--------|
| Fe5-S1B | 2.261 | 2.120 | 0.370 | 0.683 |       |       | 2.149 | 0.370 | 0.739 |              |        |
| Fe5-S3A | 2.261 | 2.120 | 0.370 | 0.683 |       |       | 2.149 | 0.370 | 0.739 |              |        |
| Fe5-S4B | 2.256 | 2.120 | 0.370 | 0.692 |       |       | 2.149 | 0.370 | 0.749 |              |        |
| Fe5-CX  | 2.006 | 1.650 | 0.370 | 0.382 | 2.441 | 0.441 | 1.689 | 0.370 | 0.425 | <b>2.651</b> | -0.349 |
| Fe6-S1B | 2.237 | 2.120 | 0.370 | 0.729 |       |       | 2.149 | 0.370 | 0.788 |              |        |
| Fe6-S3B | 2.220 | 2.120 | 0.370 | 0.763 |       |       | 2.149 | 0.370 | 0.825 |              |        |
| Fe6-S2B | 2.178 | 2.120 | 0.370 | 0.855 |       |       | 2.149 | 0.370 | 0.925 |              |        |
| Fe6-CX  | 2.008 | 1.650 | 0.370 | 0.380 | 2.727 | 0.727 | 1.689 | 0.370 | 0.422 | <b>2.961</b> | -0.039 |
| Fe7-S3B | 2.253 | 2.120 | 0.370 | 0.698 |       |       | 2.149 | 0.370 | 0.755 |              |        |
| Fe7-S4B | 2.221 | 2.120 | 0.370 | 0.761 |       |       | 2.149 | 0.370 | 0.823 |              |        |
| Fe7-S5A | 2.213 | 2.120 | 0.370 | 0.778 |       |       | 2.149 | 0.370 | 0.841 |              |        |
| Fe7-CX  | 1.979 | 1.650 | 0.370 | 0.411 | 2.648 | 0.648 | 1.689 | 0.370 | 0.457 | <b>2.876</b> | -0.124 |

---

**Table S2** The bond valence analyses for irons in FeMo-cofactor (2) from MoFe protein 3U7Q which perform the most accurate structure with resolution of 1.00 Å.

| Bond                  | $r_{ij}$ (Å) | $R_0$ (Å) | B (Å) | Bval  | Sum          | Diff.                 | $R_0$ (Å) | B (Å) | Bval  | Sum          | Diff.  |
|-----------------------|--------------|-----------|-------|-------|--------------|-----------------------|-----------|-------|-------|--------------|--------|
| expected valence = +2 |              |           |       |       |              | expected valence = +3 |           |       |       |              |        |
| Fe1–S1A               | 2.295        | 2.120     | 0.370 | 0.623 |              |                       | 2.149     | 0.370 | 0.674 |              |        |
| Fe1–S2A               | 2.266        | 2.120     | 0.370 | 0.674 |              |                       | 2.149     | 0.370 | 0.729 |              |        |
| Fe1–S4A               | 2.287        | 2.120     | 0.370 | 0.637 |              |                       | 2.149     | 0.370 | 0.689 |              |        |
| Fe1–SG                | 2.269        | 2.120     | 0.370 | 0.669 | 2.602        | 0.602                 | 2.149     | 0.370 | 0.723 | <b>2.815</b> | -0.185 |
| Fe2–S1A               | 2.261        | 2.120     | 0.370 | 0.683 |              |                       | 2.149     | 0.370 | 0.739 |              |        |
| Fe2–S2A               | 2.254        | 2.120     | 0.370 | 0.696 |              |                       | 2.149     | 0.370 | 0.753 |              |        |
| Fe2–S2B               | 2.206        | 2.120     | 0.370 | 0.793 |              |                       | 2.149     | 0.370 | 0.857 |              |        |
| Fe2–CX                | 1.997        | 1.650     | 0.370 | 0.391 | 2.563        | 0.563                 | 1.689     | 0.370 | 0.435 | <b>2.784</b> | -0.216 |
| Fe3–S2A               | 2.275        | 2.120     | 0.370 | 0.658 |              |                       | 2.149     | 0.370 | 0.711 |              |        |
| Fe3–S4A               | 2.254        | 2.120     | 0.370 | 0.696 |              |                       | 2.149     | 0.370 | 0.753 |              |        |
| Fe3–S5A               | 2.221        | 2.120     | 0.370 | 0.761 |              |                       | 2.149     | 0.370 | 0.823 |              |        |
| Fe3–CX                | 1.984        | 1.650     | 0.370 | 0.405 | 2.521        | 0.521                 | 1.689     | 0.370 | 0.451 | <b>2.738</b> | -0.262 |
| Fe4–S1A               | 2.286        | 2.120     | 0.370 | 0.638 |              |                       | 2.149     | 0.370 | 0.691 |              |        |
| Fe4–S3A               | 2.240        | 2.120     | 0.370 | 0.723 |              |                       | 2.149     | 0.370 | 0.782 |              |        |
| Fe4–S4A               | 2.287        | 2.120     | 0.370 | 0.637 |              |                       | 2.149     | 0.370 | 0.689 |              |        |
| Fe4–CX                | 1.991        | 1.650     | 0.370 | 0.398 | <b>2.396</b> | 0.396                 | 1.689     | 0.370 | 0.442 | 2.603        | -0.397 |

|         |       |       |       |       |       |       |       |       |       |              |        |
|---------|-------|-------|-------|-------|-------|-------|-------|-------|-------|--------------|--------|
| Fe5-S1B | 2.268 | 2.120 | 0.370 | 0.670 |       |       | 2.149 | 0.370 | 0.725 |              |        |
| Fe5-S3A | 2.261 | 2.120 | 0.370 | 0.683 |       |       | 2.149 | 0.370 | 0.739 |              |        |
| Fe5-S4B | 2.250 | 2.120 | 0.370 | 0.704 |       |       | 2.149 | 0.370 | 0.761 |              |        |
| Fe5-CX  | 2.008 | 1.650 | 0.370 | 0.380 | 2.437 | 0.437 | 1.689 | 0.370 | 0.422 | <b>2.647</b> | -0.353 |
| Fe6-S1B | 2.234 | 2.120 | 0.370 | 0.735 |       |       | 2.149 | 0.370 | 0.795 |              |        |
| Fe6-S3B | 2.219 | 2.120 | 0.370 | 0.765 |       |       | 2.149 | 0.370 | 0.828 |              |        |
| Fe6-S2B | 2.173 | 2.120 | 0.370 | 0.867 |       |       | 2.149 | 0.370 | 0.937 |              |        |
| Fe6-CX  | 2.018 | 1.650 | 0.370 | 0.370 | 2.736 | 0.736 | 1.689 | 0.370 | 0.411 | <b>2.971</b> | -0.029 |
| Fe7-S3B | 2.246 | 2.120 | 0.370 | 0.711 |       |       | 2.149 | 0.370 | 0.769 |              |        |
| Fe7-S4B | 2.220 | 2.120 | 0.370 | 0.763 |       |       | 2.149 | 0.370 | 0.825 |              |        |
| Fe7-S5A | 2.210 | 2.120 | 0.370 | 0.784 |       |       | 2.149 | 0.370 | 0.848 |              |        |
| Fe7-CX  | 1.997 | 1.650 | 0.370 | 0.391 | 2.650 | 0.650 | 1.689 | 0.370 | 0.435 | <b>2.878</b> | -0.122 |

---

**Table S3** The bond valence analyses for irons in FeMo-cofactor (1) from MoFe protein 4TKV which coordinated with single CO between Fe2 and Fe6 with resolution of 1.50 Å.

| Bond                  | $r_{ij}$ (Å) | $R_0$ (Å) | B (Å) | Bval  | Sum          | Diff.                 | $R_0$ (Å) | B (Å) | Bval  | Sum          | Diff.  |
|-----------------------|--------------|-----------|-------|-------|--------------|-----------------------|-----------|-------|-------|--------------|--------|
| expected valence = +2 |              |           |       |       |              | expected valence = +3 |           |       |       |              |        |
| Fe1–S1A               | 2.281        | 2.120     | 0.370 | 0.647 |              |                       | 2.149     | 0.370 | 0.700 |              |        |
| Fe1–S2A               | 2.250        | 2.120     | 0.370 | 0.704 |              |                       | 2.149     | 0.370 | 0.761 |              |        |
| Fe1–S4A               | 2.287        | 2.120     | 0.370 | 0.637 |              |                       | 2.149     | 0.370 | 0.689 |              |        |
| Fe1–SG                | 2.264        | 2.120     | 0.370 | 0.678 | 2.665        | 0.665                 | 2.149     | 0.370 | 0.733 | <b>2.883</b> | -0.117 |
| Fe2–S1A               | 2.224        | 2.120     | 0.370 | 0.755 |              |                       | 2.149     | 0.370 | 0.817 |              |        |
| Fe2–S2A               | 2.217        | 2.120     | 0.370 | 0.769 |              |                       | 2.149     | 0.370 | 0.832 |              |        |
| Fe2–S2B               | 1.856        | 1.470     | 0.370 | 0.352 |              |                       | 1.689     | 0.370 | 0.637 |              |        |
| Fe2–CX                | 2.004        | 1.650     | 0.370 | 0.384 | 2.482        | 0.482                 | 1.689     | 0.370 | 0.427 | <b>2.712</b> | -0.288 |
| Fe3–S2A               | 2.294        | 2.120     | 0.370 | 0.625 |              |                       | 2.149     | 0.370 | 0.676 |              |        |
| Fe3–S4A               | 2.258        | 2.120     | 0.370 | 0.689 |              |                       | 2.149     | 0.370 | 0.745 |              |        |
| Fe3–S5A               | 2.197        | 2.120     | 0.370 | 0.812 |              |                       | 2.149     | 0.370 | 0.878 |              |        |
| Fe3–CX                | 1.962        | 1.650     | 0.370 | 0.430 | 2.556        | 0.556                 | 1.689     | 0.370 | 0.478 | <b>2.777</b> | -0.223 |
| Fe4–S1A               | 2.285        | 2.120     | 0.370 | 0.640 |              |                       | 2.149     | 0.370 | 0.692 |              |        |
| Fe4–S3A               | 2.244        | 2.120     | 0.370 | 0.715 |              |                       | 2.149     | 0.370 | 0.774 |              |        |
| Fe4–S4A               | 2.310        | 2.120     | 0.370 | 0.598 |              |                       | 2.149     | 0.370 | 0.647 |              |        |
| Fe4–CX                | 1.986        | 1.650     | 0.370 | 0.403 | <b>2.357</b> | 0.357                 | 1.689     | 0.370 | 0.448 | 2.561        | -0.439 |

|         |       |       |       |       |       |       |       |       |       |              |        |
|---------|-------|-------|-------|-------|-------|-------|-------|-------|-------|--------------|--------|
| Fe5-S1B | 2.272 | 2.120 | 0.370 | 0.663 |       |       | 2.149 | 0.370 | 0.717 |              |        |
| Fe5-S3A | 2.273 | 2.120 | 0.370 | 0.661 |       |       | 2.149 | 0.370 | 0.715 |              |        |
| Fe5-S4B | 2.204 | 2.120 | 0.370 | 0.797 |       |       | 2.149 | 0.370 | 0.862 |              |        |
| Fe5-CX  | 2.009 | 1.650 | 0.370 | 0.379 | 2.500 | 0.500 | 1.689 | 0.370 | 0.421 | <b>2.715</b> | -0.285 |
| Fe6-S1B | 2.166 | 2.120 | 0.370 | 0.883 |       |       | 2.149 | 0.370 | 0.955 |              |        |
| Fe6-S3B | 2.189 | 2.120 | 0.370 | 0.830 |       |       | 2.149 | 0.370 | 0.898 |              |        |
| Fe6-S2B | 1.852 | 1.470 | 0.370 | 0.356 |       |       | 1.689 | 0.370 | 0.644 |              |        |
| Fe6-CX  | 2.008 | 1.650 | 0.370 | 0.380 | 2.672 | 0.672 | 1.689 | 0.370 | 0.422 | <b>2.919</b> | -0.081 |
| Fe7-S3B | 2.218 | 2.120 | 0.370 | 0.767 |       |       | 2.149 | 0.370 | 0.830 |              |        |
| Fe7-S4B | 2.225 | 2.120 | 0.370 | 0.753 |       |       | 2.149 | 0.370 | 0.814 |              |        |
| Fe7-S5A | 2.212 | 2.120 | 0.370 | 0.780 |       |       | 2.149 | 0.370 | 0.843 |              |        |
| Fe7-CX  | 1.961 | 1.650 | 0.370 | 0.431 | 2.732 | 0.732 | 1.689 | 0.370 | 0.479 | <b>2.967</b> | -0.033 |

---



**Table S4** The bond valence analyses for irons in FeMo-cofactor (2) from MoFe protein 4TKV which coordinated with single CO between Fe2 and Fe6 with resolution of 1.50 Å.

| Bond                  | $r_{ij}$ (Å) | $R_0$ (Å) | B (Å) | Bval  | Sum          | Diff.                 | $R_0$ (Å) | B (Å) | Bval  | Sum          | Diff.  |
|-----------------------|--------------|-----------|-------|-------|--------------|-----------------------|-----------|-------|-------|--------------|--------|
| expected valence = +2 |              |           |       |       |              | expected valence = +3 |           |       |       |              |        |
| Fe1–S1A               | 2.285        | 2.120     | 0.370 | 0.640 |              |                       | 2.149     | 0.370 | 0.692 |              |        |
| Fe1–S2A               | 2.234        | 2.120     | 0.370 | 0.735 |              |                       | 2.149     | 0.370 | 0.795 |              |        |
| Fe1–S4A               | 2.285        | 2.120     | 0.370 | 0.640 |              |                       | 2.149     | 0.370 | 0.692 |              |        |
| Fe1–SG                | 2.250        | 2.120     | 0.370 | 0.704 | 2.719        | 0.719                 | 2.149     | 0.370 | 0.761 | <b>2.941</b> | -0.059 |
| Fe2–S1A               | 2.219        | 2.120     | 0.370 | 0.765 |              |                       | 2.149     | 0.370 | 0.828 |              |        |
| Fe2–S2A               | 2.229        | 2.120     | 0.370 | 0.745 |              |                       | 2.149     | 0.370 | 0.806 |              |        |
| Fe2–S2B               | 1.865        | 1.470     | 0.370 | 0.344 |              |                       | 1.689     | 0.370 | 0.621 |              |        |
| Fe2–CX                | 1.998        | 1.650     | 0.370 | 0.390 | 2.460        | 0.460                 | 1.689     | 0.370 | 0.434 | <b>2.688</b> | -0.312 |
| Fe3–S2A               | 2.281        | 2.120     | 0.370 | 0.647 |              |                       | 2.149     | 0.370 | 0.700 |              |        |
| Fe3–S4A               | 2.253        | 2.120     | 0.370 | 0.698 |              |                       | 2.149     | 0.370 | 0.755 |              |        |
| Fe3–S5A               | 2.199        | 2.120     | 0.370 | 0.808 |              |                       | 2.149     | 0.370 | 0.874 |              |        |
| Fe3–CX                | 1.970        | 1.650     | 0.370 | 0.421 | 2.574        | 0.574                 | 1.689     | 0.370 | 0.468 | <b>2.796</b> | -0.204 |
| Fe4–S1A               | 2.292        | 2.120     | 0.370 | 0.628 |              |                       | 2.149     | 0.370 | 0.679 |              |        |
| Fe4–S3A               | 2.244        | 2.120     | 0.370 | 0.715 |              |                       | 2.149     | 0.370 | 0.774 |              |        |
| Fe4–S4A               | 2.280        | 2.120     | 0.370 | 0.649 |              |                       | 2.149     | 0.370 | 0.702 |              |        |
| Fe4–CX                | 1.995        | 1.650     | 0.370 | 0.394 | <b>2.386</b> | 0.386                 | 1.689     | 0.370 | 0.437 | 2.592        | -0.408 |

|         |       |       |       |       |       |       |       |       |       |              |        |
|---------|-------|-------|-------|-------|-------|-------|-------|-------|-------|--------------|--------|
| Fe5-S1B | 2.281 | 2.120 | 0.370 | 0.647 |       |       | 2.149 | 0.370 | 0.700 |              |        |
| Fe5-S3A | 2.269 | 2.120 | 0.370 | 0.669 |       |       | 2.149 | 0.370 | 0.723 |              |        |
| Fe5-S4B | 2.212 | 2.120 | 0.370 | 0.780 |       |       | 2.149 | 0.370 | 0.843 |              |        |
| Fe5-CX  | 2.010 | 1.650 | 0.370 | 0.378 | 2.473 | 0.473 | 1.689 | 0.370 | 0.420 | <b>2.686</b> | -0.314 |
| Fe6-S1B | 2.181 | 2.120 | 0.370 | 0.848 |       |       | 2.149 | 0.370 | 0.917 |              |        |
| Fe6-S3B | 2.196 | 2.120 | 0.370 | 0.814 |       |       | 2.149 | 0.370 | 0.881 |              |        |
| Fe6-S2B | 1.865 | 1.470 | 0.370 | 0.344 |       |       | 1.689 | 0.370 | 0.621 |              |        |
| Fe6-CX  | 2.017 | 1.650 | 0.370 | 0.371 | 2.592 | 0.592 | 1.689 | 0.370 | 0.412 | <b>2.831</b> | -0.169 |
| Fe7-S3B | 2.232 | 2.120 | 0.370 | 0.739 |       |       | 2.149 | 0.370 | 0.799 |              |        |
| Fe7-S4B | 2.233 | 2.120 | 0.370 | 0.737 |       |       | 2.149 | 0.370 | 0.797 |              |        |
| Fe7-S5A | 2.192 | 2.120 | 0.370 | 0.823 |       |       | 2.149 | 0.370 | 0.890 |              |        |
| Fe7-CX  | 1.978 | 1.650 | 0.370 | 0.412 | 2.711 | 0.711 | 1.689 | 0.370 | 0.458 | <b>2.944</b> | -0.056 |

---

**Table S5** The bond valence analyses for irons in FeMo-cofactor (1) from MoFe protein 7JRF which coordinated with double CO on Fe6 with resolution of 1.33 Å.

| Bond                  | $r_{ij}$ (Å) | $R_0$ (Å) | B (Å) | Bval  | Sum          | Diff.                 | $R_0$ (Å) | B (Å) | Bval  | Sum          | Diff.  |
|-----------------------|--------------|-----------|-------|-------|--------------|-----------------------|-----------|-------|-------|--------------|--------|
| expected valence = +2 |              |           |       |       |              | expected valence = +3 |           |       |       |              |        |
| Fe1–S1A               | 2.285        | 2.120     | 0.370 | 0.640 |              |                       | 2.149     | 0.370 | 0.692 |              |        |
| Fe1–S2A               | 2.258        | 2.120     | 0.370 | 0.689 |              |                       | 2.149     | 0.370 | 0.745 |              |        |
| Fe1–S4A               | 2.299        | 2.120     | 0.370 | 0.616 |              |                       | 2.149     | 0.370 | 0.667 |              |        |
| Fe1–SG                | 2.283        | 2.120     | 0.370 | 0.644 | 2.589        | 0.589                 | 2.149     | 0.370 | 0.696 | <b>2.800</b> | -0.200 |
| Fe2–S1A               | 2.218        | 2.120     | 0.370 | 0.767 |              |                       | 2.149     | 0.370 | 0.830 |              |        |
| Fe2–S2A               | 2.233        | 2.120     | 0.370 | 0.737 |              |                       | 2.149     | 0.370 | 0.797 |              |        |
| Fe2–C1                | 1.928        | 1.650     | 0.370 | 0.472 |              |                       | 1.689     | 0.370 | 0.524 |              |        |
| Fe2–CX                | 1.967        | 1.650     | 0.370 | 0.425 | 2.400        | 0.400                 | 1.689     | 0.370 | 0.472 | <b>2.623</b> | -0.377 |
| Fe3–S2A               | 2.275        | 2.120     | 0.370 | 0.658 |              |                       | 2.149     | 0.370 | 0.711 |              |        |
| Fe3–S4A               | 2.251        | 2.120     | 0.370 | 0.702 |              |                       | 2.149     | 0.370 | 0.759 |              |        |
| Fe3–S5A               | 2.233        | 2.120     | 0.370 | 0.737 |              |                       | 2.149     | 0.370 | 0.797 |              |        |
| Fe3–CX                | 1.959        | 1.650     | 0.370 | 0.434 | 2.530        | 0.530                 | 1.689     | 0.370 | 0.482 | <b>2.749</b> | -0.251 |
| Fe4–S1A               | 2.302        | 2.120     | 0.370 | 0.611 |              |                       | 2.149     | 0.370 | 0.661 |              |        |
| Fe4–S3A               | 2.261        | 2.120     | 0.370 | 0.683 |              |                       | 2.149     | 0.370 | 0.739 |              |        |
| Fe4–S4A               | 2.282        | 2.120     | 0.370 | 0.645 |              |                       | 2.149     | 0.370 | 0.698 |              |        |
| Fe4–CX                | 1.996        | 1.650     | 0.370 | 0.393 | <b>2.333</b> | 0.333                 | 1.689     | 0.370 | 0.436 | 2.534        | -0.466 |

|         |       |       |       |       |       |       |       |       |       |              |        |
|---------|-------|-------|-------|-------|-------|-------|-------|-------|-------|--------------|--------|
| Fe5-S1B | 2.248 | 2.120 | 0.370 | 0.708 |       |       | 2.149 | 0.370 | 0.765 |              |        |
| Fe5-S3A | 2.283 | 2.120 | 0.370 | 0.644 |       |       | 2.149 | 0.370 | 0.696 |              |        |
| Fe5-S4B | 2.247 | 2.120 | 0.370 | 0.709 |       |       | 2.149 | 0.370 | 0.767 |              |        |
| Fe5-CX  | 2.018 | 1.650 | 0.370 | 0.370 | 2.431 | 0.431 | 1.689 | 0.370 | 0.411 | <b>2.640</b> | -0.360 |
| Fe6-S1B | 2.227 | 2.120 | 0.370 | 0.749 |       |       | 2.149 | 0.370 | 0.810 |              |        |
| Fe6-S3A | 2.224 | 2.120 | 0.370 | 0.755 |       |       | 2.149 | 0.370 | 0.817 |              |        |
| Fe6-C2  | 2.031 | 1.650 | 0.370 | 0.357 |       |       | 1.689 | 0.370 | 0.397 |              |        |
| Fe6-C1  | 1.917 | 1.650 | 0.370 | 0.486 |       |       | 1.689 | 0.370 | 0.540 |              |        |
| Fe6-CX  | 2.063 | 1.650 | 0.370 | 0.328 | 2.674 | 0.674 | 1.689 | 0.370 | 0.364 | <b>2.927</b> | -0.073 |
| Fe7-S3B | 2.241 | 2.120 | 0.370 | 0.721 |       |       | 2.149 | 0.370 | 0.780 |              |        |
| Fe7-S4B | 2.244 | 2.120 | 0.370 | 0.715 |       |       | 2.149 | 0.370 | 0.774 |              |        |
| Fe7-S5A | 2.194 | 2.120 | 0.370 | 0.819 |       |       | 2.149 | 0.370 | 0.885 |              |        |
| Fe7-CX  | 1.979 | 1.650 | 0.370 | 0.411 | 2.666 | 0.666 | 1.689 | 0.370 | 0.457 | <b>2.896</b> | -0.104 |

---

**Table S6** The bond valence analyses for irons in FeMo-cofactor (2) from MoFe protein 7JRF which coordinated with double CO on Fe6 with resolution of 1.33 Å.

| Bond                  | $r_{ij}$ (Å) | $R_0$ (Å) | B (Å) | Bval  | Sum          | Diff.                 | $R_0$ (Å) | B (Å) | Bval  | Sum          | Diff.  |
|-----------------------|--------------|-----------|-------|-------|--------------|-----------------------|-----------|-------|-------|--------------|--------|
| expected valence = +2 |              |           |       |       |              | expected valence = +3 |           |       |       |              |        |
| Fe1–S1A               | 2.295        | 2.120     | 0.370 | 0.623 |              |                       | 2.149     | 0.370 | 0.674 |              |        |
| Fe1–S2A               | 2.249        | 2.120     | 0.370 | 0.706 |              |                       | 2.149     | 0.370 | 0.763 |              |        |
| Fe1–S4A               | 2.286        | 2.120     | 0.370 | 0.638 |              |                       | 2.149     | 0.370 | 0.691 |              |        |
| Fe1–SG                | 2.270        | 2.120     | 0.370 | 0.667 | 2.634        | 0.634                 | 2.149     | 0.370 | 0.721 | <b>2.849</b> | -0.151 |
| Fe2–S1A               | 2.235        | 2.120     | 0.370 | 0.733 |              |                       | 2.149     | 0.370 | 0.793 |              |        |
| Fe2–S2A               | 2.220        | 2.120     | 0.370 | 0.763 |              |                       | 2.149     | 0.370 | 0.825 |              |        |
| Fe2–C                 | 1.900        | 1.470     | 0.370 | 0.313 |              |                       | 1.689     | 0.370 | 0.565 |              |        |
| Fe2–CX                | 1.989        | 1.650     | 0.370 | 0.400 | 2.405        | 0.405                 | 1.689     | 0.370 | 0.444 | <b>2.628</b> | -0.372 |
| Fe3–S2A               | 2.271        | 2.120     | 0.370 | 0.665 |              |                       | 2.149     | 0.370 | 0.719 |              |        |
| Fe3–S4A               | 2.249        | 2.120     | 0.370 | 0.706 |              |                       | 2.149     | 0.370 | 0.763 |              |        |
| Fe3–S5A               | 2.222        | 2.120     | 0.370 | 0.759 |              |                       | 2.149     | 0.370 | 0.821 |              |        |
| Fe3–CX                | 1.975        | 1.650     | 0.370 | 0.415 | 2.545        | 0.545                 | 1.689     | 0.370 | 0.462 | <b>2.765</b> | -0.235 |
| Fe4–S1A               | 2.301        | 2.120     | 0.370 | 0.613 |              |                       | 2.149     | 0.370 | 0.663 |              |        |
| Fe4–S3A               | 2.239        | 2.120     | 0.370 | 0.725 |              |                       | 2.149     | 0.370 | 0.784 |              |        |
| Fe4–S4A               | 2.285        | 2.120     | 0.370 | 0.640 |              |                       | 2.149     | 0.370 | 0.692 |              |        |
| Fe4–CX                | 1.991        | 1.650     | 0.370 | 0.398 | <b>2.376</b> | 0.376                 | 1.689     | 0.370 | 0.442 | 2.582        | -0.418 |

|         |       |       |       |       |       |       |       |       |       |              |        |
|---------|-------|-------|-------|-------|-------|-------|-------|-------|-------|--------------|--------|
| Fe5-S1B | 2.265 | 2.120 | 0.370 | 0.676 |       |       | 2.149 | 0.370 | 0.731 |              |        |
| Fe5-S3A | 2.287 | 2.120 | 0.370 | 0.637 |       |       | 2.149 | 0.370 | 0.689 |              |        |
| Fe5-S4B | 2.249 | 2.120 | 0.370 | 0.706 |       |       | 2.149 | 0.370 | 0.763 |              |        |
| Fe5-CX  | 1.996 | 1.650 | 0.370 | 0.393 | 2.411 | 0.411 | 1.689 | 0.370 | 0.436 | <b>2.619</b> | -0.381 |
| Fe6-S1B | 2.226 | 2.120 | 0.370 | 0.751 |       |       | 2.149 | 0.370 | 0.812 |              |        |
| Fe6-S3B | 2.223 | 2.120 | 0.370 | 0.757 |       |       | 2.149 | 0.370 | 0.819 |              |        |
| Fe6-C1  | 1.931 | 1.650 | 0.370 | 0.468 |       |       | 1.689 | 0.370 | 0.520 |              |        |
| Fe6-C2  | 1.930 | 1.650 | 0.370 | 0.469 |       |       | 1.689 | 0.370 | 0.521 |              |        |
| Fe6-CX  | 2.088 | 1.650 | 0.370 | 0.306 | 2.751 | 0.751 | 1.689 | 0.370 | 0.340 | <b>3.012</b> | 0.012  |
| Fe7-S3B | 2.254 | 2.120 | 0.370 | 0.696 |       |       | 2.149 | 0.370 | 0.753 |              |        |
| Fe7-S4B | 2.210 | 2.120 | 0.370 | 0.784 |       |       | 2.149 | 0.370 | 0.848 |              |        |
| Fe7-S5A | 2.212 | 2.120 | 0.370 | 0.780 |       |       | 2.149 | 0.370 | 0.843 |              |        |
| Fe7-CX  | 1.973 | 1.650 | 0.370 | 0.418 | 2.678 | 0.678 | 1.689 | 0.370 | 0.464 | <b>2.909</b> | -0.091 |

---

**Table S7** The bond valence analyses for irons in FeMo-cofactor (1) from MoFe protein 6UG0 which coordinated with single N<sub>2</sub> between Fe2 and Fe6 with resolution of 1.83 Å..

| Bond                  | $r_{ij}$ (Å) | $R_0$ (Å) | B (Å) | Bval  | Sum          | Diff.                 | $R_0$ (Å) | B (Å) | Bval  | Sum          | Diff.  |
|-----------------------|--------------|-----------|-------|-------|--------------|-----------------------|-----------|-------|-------|--------------|--------|
| expected valence = +2 |              |           |       |       |              | expected valence = +3 |           |       |       |              |        |
| Fe1–S1A               | 2.297        | 2.120     | 0.370 | 0.620 |              |                       | 2.149     | 0.370 | 0.670 |              |        |
| Fe1–S2A               | 2.244        | 2.120     | 0.370 | 0.715 |              |                       | 2.149     | 0.370 | 0.774 |              |        |
| Fe1–S4A               | 2.264        | 2.120     | 0.370 | 0.678 |              |                       | 2.149     | 0.370 | 0.733 |              |        |
| Fe1–SG                | 2.234        | 2.120     | 0.370 | 0.735 | 2.747        | 0.747                 | 2.149     | 0.370 | 0.795 | <b>2.971</b> | -0.029 |
| Fe2–S1A               | 2.277        | 2.120     | 0.370 | 0.654 |              |                       | 2.149     | 0.370 | 0.708 |              |        |
| Fe2–S2A               | 2.228        | 2.120     | 0.370 | 0.747 |              |                       | 2.149     | 0.370 | 0.808 |              |        |
| Fe2–N6A               | 1.750        | 1.769     | 0.370 | 1.053 |              |                       | 1.815     | 0.370 | 1.192 |              |        |
| Fe2–CX                | 2.015        | 1.650     | 0.370 | 0.373 | 2.827        | 0.827                 | 1.689     | 0.370 | 0.414 | <b>3.122</b> | 0.122  |
| Fe3–S2A               | 2.293        | 2.120     | 0.370 | 0.627 |              |                       | 2.149     | 0.370 | 0.678 |              |        |
| Fe3–S4A               | 2.280        | 2.120     | 0.370 | 0.649 |              |                       | 2.149     | 0.370 | 0.702 |              |        |
| Fe3–S5A               | 2.195        | 2.120     | 0.370 | 0.817 |              |                       | 2.149     | 0.370 | 0.883 |              |        |
| Fe3–CX                | 1.969        | 1.650     | 0.370 | 0.422 | 2.514        | 0.514                 | 1.689     | 0.370 | 0.469 | <b>2.732</b> | -0.268 |
| Fe4–S1A               | 2.308        | 2.120     | 0.370 | 0.602 |              |                       | 2.149     | 0.370 | 0.651 |              |        |
| Fe4–S3A               | 2.219        | 2.120     | 0.370 | 0.765 |              |                       | 2.149     | 0.370 | 0.828 |              |        |
| Fe4–S4A               | 2.279        | 2.120     | 0.370 | 0.651 |              |                       | 2.149     | 0.370 | 0.704 |              |        |
| Fe4–CX                | 2.033        | 1.650     | 0.370 | 0.355 | <b>2.373</b> | 0.373                 | 1.689     | 0.370 | 0.395 | 2.577        | -0.423 |

|         |       |       |       |       |              |        |       |       |       |              |        |
|---------|-------|-------|-------|-------|--------------|--------|-------|-------|-------|--------------|--------|
| Fe5-S1B | 2.257 | 2.120 | 0.370 | 0.691 |              |        | 2.149 | 0.370 | 0.747 |              |        |
| Fe5-S3A | 2.255 | 2.120 | 0.370 | 0.694 |              |        | 2.149 | 0.370 | 0.751 |              |        |
| Fe5-S4B | 2.254 | 2.120 | 0.370 | 0.696 |              |        | 2.149 | 0.370 | 0.753 |              |        |
| Fe5-CX  | 1.987 | 1.650 | 0.370 | 0.402 | 2.483        | 0.483  | 1.689 | 0.370 | 0.447 | <b>2.698</b> | -0.302 |
| Fe6-S1B | 2.250 | 2.120 | 0.370 | 0.704 |              |        | 2.149 | 0.370 | 0.761 |              |        |
| Fe6-S3A | 2.249 | 2.120 | 0.370 | 0.706 |              |        | 2.149 | 0.370 | 0.763 |              |        |
| Fe6-N6B | 2.369 | 1.769 | 0.370 | 0.198 |              |        | 1.815 | 0.370 | 0.224 |              |        |
| Fe6-CX  | 1.996 | 1.650 | 0.370 | 0.393 | <b>1.999</b> | -0.001 | 1.689 | 0.370 | 0.436 | 2.184        | -0.816 |
| Fe7-S3B | 2.210 | 2.120 | 0.370 | 0.784 |              |        | 2.149 | 0.370 | 0.848 |              |        |
| Fe7-S4B | 2.235 | 2.120 | 0.370 | 0.733 |              |        | 2.149 | 0.370 | 0.793 |              |        |
| Fe7-S5A | 2.204 | 2.120 | 0.370 | 0.797 |              |        | 2.149 | 0.370 | 0.862 |              |        |
| Fe7-CX  | 2.003 | 1.650 | 0.370 | 0.385 | 2.699        | 0.699  | 1.689 | 0.370 | 0.428 | <b>2.930</b> | -0.070 |



**Table S8** The bond valence analyses for irons in FeMo-cofactor (2) from MoFe protein 6UG0 which coordinated with double N<sub>2</sub> with resolution of 1.83 Å.

| Bond                  | $r_{ij}$ (Å) | $R_0$ (Å) | B (Å) | Bval  | Sum          | Diff.                 | $R_0$ (Å) | B (Å) | Bval  | Sum          | Diff.  |
|-----------------------|--------------|-----------|-------|-------|--------------|-----------------------|-----------|-------|-------|--------------|--------|
| expected valence = +2 |              |           |       |       |              | expected valence = +3 |           |       |       |              |        |
| Fe1-S1A               | 2.294        | 2.120     | 0.370 | 0.625 |              |                       | 2.149     | 0.370 | 0.676 |              |        |
| Fe1-S2A               | 2.259        | 2.120     | 0.370 | 0.687 |              |                       | 2.149     | 0.370 | 0.743 |              |        |
| Fe1-S4A               | 2.278        | 2.120     | 0.370 | 0.652 |              |                       | 2.149     | 0.370 | 0.706 |              |        |
| Fe1-SG                | 2.293        | 2.120     | 0.370 | 0.627 | 2.591        | 0.591                 | 2.149     | 0.370 | 0.678 | <b>2.802</b> | -0.198 |
| Fe2-S1A               | 2.259        | 2.120     | 0.370 | 0.687 |              |                       | 2.149     | 0.370 | 0.743 |              |        |
| Fe2-S2A               | 2.235        | 2.120     | 0.370 | 0.733 |              |                       | 2.149     | 0.370 | 0.793 |              |        |
| Fe2-S2B               | 2.158        | 2.120     | 0.370 | 0.902 |              |                       | 2.149     | 0.370 | 0.976 |              |        |
| Fe2-CX                | 2.031        | 1.650     | 0.370 | 0.357 | 2.679        | 0.679                 | 1.689     | 0.370 | 0.397 | <b>2.908</b> | -0.092 |
| Fe3-S2A               | 2.259        | 2.120     | 0.370 | 0.687 |              |                       | 2.149     | 0.370 | 0.743 |              |        |
| Fe3-S4A               | 2.217        | 2.120     | 0.370 | 0.769 |              |                       | 2.149     | 0.370 | 0.832 |              |        |
| Fe3-N6A               | 2.143        | 1.769     | 0.370 | 0.364 |              |                       | 1.815     | 0.370 | 0.412 |              |        |
| Fe3-CX                | 2.012        | 1.650     | 0.370 | 0.376 | <b>2.196</b> | 0.196                 | 1.689     | 0.370 | 0.418 | 2.405        | -0.595 |
| Fe4-S1A               | 2.257        | 2.120     | 0.370 | 0.691 |              |                       | 2.149     | 0.370 | 0.747 |              |        |
| Fe4-N6A               | 1.785        | 1.769     | 0.370 | 0.958 |              |                       | 1.815     | 0.370 | 1.084 |              |        |
| Fe4-S4A               | 2.284        | 2.120     | 0.370 | 0.642 |              |                       | 2.149     | 0.370 | 0.694 |              |        |
| Fe4-CX                | 1.995        | 1.650     | 0.370 | 0.394 | 2.684        | 0.684                 | 1.689     | 0.370 | 0.437 | <b>2.963</b> | -0.037 |
| Fe5-S1B               | 2.291        | 2.120     | 0.370 | 0.630 |              |                       | 2.149     | 0.370 | 0.681 |              |        |

|         |       |       |       |       |              |       |       |       |       |              |        |
|---------|-------|-------|-------|-------|--------------|-------|-------|-------|-------|--------------|--------|
| Fe5-N6A | 2.136 | 1.769 | 0.370 | 0.371 |              |       | 1.815 | 0.370 | 0.420 |              |        |
| Fe5-S4B | 2.281 | 2.120 | 0.370 | 0.647 |              |       | 2.149 | 0.370 | 0.700 |              |        |
| Fe5-CX  | 2.034 | 1.650 | 0.370 | 0.354 | <b>2.002</b> | 0.002 | 1.689 | 0.370 | 0.394 | 2.195        | -0.805 |
| Fe6-S1B | 2.170 | 2.120 | 0.370 | 0.874 |              |       | 2.149 | 0.370 | 0.945 |              |        |
| Fe6-S3B | 2.252 | 2.120 | 0.370 | 0.700 |              |       | 2.149 | 0.370 | 0.757 |              |        |
| Fe6-S2B | 2.178 | 2.120 | 0.370 | 0.855 |              |       | 2.149 | 0.370 | 0.925 |              |        |
| Fe6-CX  | 2.007 | 1.650 | 0.370 | 0.381 | 2.809        | 0.809 | 1.689 | 0.370 | 0.423 | <b>3.050</b> | 0.050  |
| Fe7-S3B | 2.246 | 2.120 | 0.370 | 0.711 |              |       | 2.149 | 0.370 | 0.769 |              |        |
| Fe7-S4B | 2.218 | 2.120 | 0.370 | 0.767 |              |       | 2.149 | 0.370 | 0.830 |              |        |
| Fe7-N6A | 1.779 | 1.769 | 0.370 | 0.973 |              |       | 1.815 | 0.370 | 1.102 |              |        |
| Fe7-CX  | 1.993 | 1.650 | 0.370 | 0.396 | 2.848        | 0.848 | 1.689 | 0.370 | 0.440 | <b>3.141</b> | 0.141  |

**Table S9** The bond valence analyses for irons in FeMo-cofactor (1) from MoFe protein 6UG0 with single N<sub>2</sub> refined as S atom with resolution of 1.83 Å.

| Bond                  | $r_{ij}$ (Å) | $R_0$ (Å) | B (Å) | Bval  | Sum   | Diff.                 | $R_0$ (Å) | B (Å) | Bval  | Sum          | Diff.  |
|-----------------------|--------------|-----------|-------|-------|-------|-----------------------|-----------|-------|-------|--------------|--------|
| expected valence = +2 |              |           |       |       |       | expected valence = +3 |           |       |       |              |        |
| Fe1–S1A               | 2.260        | 2.120     | 0.370 | 0.685 |       |                       | 2.149     | 0.370 | 0.741 |              |        |
| Fe1–S2A               | 2.245        | 2.120     | 0.370 | 0.713 |       |                       | 2.149     | 0.370 | 0.771 |              |        |
| Fe1–S4A               | 2.273        | 2.120     | 0.370 | 0.661 |       |                       | 2.149     | 0.370 | 0.715 |              |        |
| Fe1–SG                | 2.296        | 2.120     | 0.370 | 0.621 | 2.681 | 0.681                 | 2.149     | 0.370 | 0.672 | <b>2.900</b> | -0.100 |
| Fe2–S1A               | 2.237        | 2.120     | 0.370 | 0.729 |       |                       | 2.149     | 0.370 | 0.788 |              |        |
| Fe2–S2A               | 2.241        | 2.120     | 0.370 | 0.721 |       |                       | 2.149     | 0.370 | 0.780 |              |        |
| Fe2–S2B               | 2.154        | 2.120     | 0.370 | 0.912 |       |                       | 2.149     | 0.370 | 0.987 |              |        |
| Fe2–CX                | 2.040        | 1.650     | 0.370 | 0.349 | 2.711 | 0.711                 | 1.689     | 0.370 | 0.387 | <b>2.942</b> | -0.058 |
| Fe3–S2A               | 2.348        | 2.120     | 0.370 | 0.540 |       |                       | 2.149     | 0.370 | 0.584 |              |        |
| Fe3–S4A               | 2.229        | 2.120     | 0.370 | 0.745 |       |                       | 2.149     | 0.370 | 0.806 |              |        |
| Fe3–N6A               | 2.200        | 2.120     | 0.370 | 0.806 |       |                       | 2.149     | 0.370 | 0.871 |              |        |
| Fe3–CX                | 1.954        | 1.650     | 0.370 | 0.440 | 2.530 | 0.530                 | 1.689     | 0.370 | 0.489 | <b>2.749</b> | -0.251 |
| Fe4–S1A               | 2.268        | 2.120     | 0.370 | 0.670 |       |                       | 2.149     | 0.370 | 0.725 |              |        |
| Fe4–N6A               | 2.181        | 2.120     | 0.370 | 0.848 |       |                       | 2.149     | 0.370 | 0.917 |              |        |
| Fe4–S4A               | 2.327        | 2.120     | 0.370 | 0.572 |       |                       | 2.149     | 0.370 | 0.618 |              |        |
| Fe4–CX                | 2.024        | 1.650     | 0.370 | 0.364 | 2.454 | 0.454                 | 1.689     | 0.370 | 0.404 | <b>2.665</b> | -0.335 |
| Fe5–S1B               | 2.241        | 2.120     | 0.370 | 0.721 |       |                       | 2.149     | 0.370 | 0.780 |              |        |

|         |       |       |       |       |       |       |       |       |       |              |        |
|---------|-------|-------|-------|-------|-------|-------|-------|-------|-------|--------------|--------|
| Fe5-N6A | 2.219 | 2.120 | 0.370 | 0.765 |       |       | 2.149 | 0.370 | 0.828 |              |        |
| Fe5-S4B | 2.313 | 2.120 | 0.370 | 0.594 |       |       | 2.149 | 0.370 | 0.642 |              |        |
| Fe5-CX  | 1.963 | 1.650 | 0.370 | 0.429 | 2.509 | 0.509 | 1.689 | 0.370 | 0.477 | <b>2.726</b> | -0.274 |
| Fe6-S1B | 2.205 | 2.120 | 0.370 | 0.795 |       |       | 2.149 | 0.370 | 0.860 |              |        |
| Fe6-S3B | 2.277 | 2.120 | 0.370 | 0.654 |       |       | 2.149 | 0.370 | 0.708 |              |        |
| Fe6-S2B | 2.170 | 2.120 | 0.370 | 0.874 |       |       | 2.149 | 0.370 | 0.945 |              |        |
| Fe6-CX  | 1.995 | 1.650 | 0.370 | 0.394 | 2.716 | 0.716 | 1.689 | 0.370 | 0.437 | <b>2.949</b> | -0.051 |
| Fe7-S3B | 2.198 | 2.120 | 0.370 | 0.810 |       |       | 2.149 | 0.370 | 0.876 |              |        |
| Fe7-S4B | 2.216 | 2.120 | 0.370 | 0.771 |       |       | 2.149 | 0.370 | 0.834 |              |        |
| Fe7-N6A | 2.250 | 2.120 | 0.370 | 0.704 |       |       | 2.149 | 0.370 | 0.761 |              |        |
| Fe7-CX  | 1.984 | 1.650 | 0.370 | 0.405 | 2.691 | 0.691 | 1.689 | 0.370 | 0.451 | <b>2.922</b> | -0.078 |

---

**Table S10** The bond valence analyses for irons in FeMo-cofactor (2) from MoFe protein 6UG0 with double N<sub>2</sub> refined as S atoms with resolution of 1.83 Å.

| Bond                  | $r_{ij}$ (Å) | $R_0$ (Å) | B (Å) | Bval  | Sum   | Diff.                 | $R_0$ (Å) | B (Å) | Bval  | Sum          | Diff.  |
|-----------------------|--------------|-----------|-------|-------|-------|-----------------------|-----------|-------|-------|--------------|--------|
| expected valence = +2 |              |           |       |       |       | expected valence = +3 |           |       |       |              |        |
| Fe1–S1A               | 2.323        | 2.120     | 0.370 | 0.578 |       |                       | 2.149     | 0.370 | 0.625 |              |        |
| Fe1–S2A               | 2.184        | 2.120     | 0.370 | 0.841 |       |                       | 2.149     | 0.370 | 0.910 |              |        |
| Fe1–S4A               | 2.200        | 2.120     | 0.370 | 0.806 |       |                       | 2.149     | 0.370 | 0.871 |              |        |
| Fe1–SG                | 2.240        | 2.120     | 0.370 | 0.723 | 2.947 | 0.947                 | 2.149     | 0.370 | 0.782 | <b>3.188</b> | 0.188  |
| Fe2–S1A               | 2.147        | 2.120     | 0.370 | 0.930 |       |                       | 2.149     | 0.370 | 1.005 |              |        |
| Fe2–S2A               | 2.289        | 2.120     | 0.370 | 0.633 |       |                       | 2.149     | 0.370 | 0.685 |              |        |
| Fe2–S2B               | 2.195        | 2.120     | 0.370 | 0.817 |       |                       | 2.149     | 0.370 | 0.883 |              |        |
| Fe2–CX                | 2.059        | 1.650     | 0.370 | 0.331 | 2.711 | 0.711                 | 1.689     | 0.370 | 0.368 | <b>2.941</b> | -0.059 |
| Fe3–S2A               | 2.291        | 2.120     | 0.370 | 0.630 |       |                       | 2.149     | 0.370 | 0.681 |              |        |
| Fe3–S4A               | 2.194        | 2.120     | 0.370 | 0.819 |       |                       | 2.149     | 0.370 | 0.885 |              |        |
| Fe3–N6A               | 2.267        | 2.120     | 0.370 | 0.672 |       |                       | 2.149     | 0.370 | 0.727 |              |        |
| Fe3–CX                | 2.020        | 1.650     | 0.370 | 0.368 | 2.489 | 0.489                 | 1.689     | 0.370 | 0.409 | <b>2.702</b> | -0.298 |
| Fe4–S1A               | 2.190        | 2.120     | 0.370 | 0.828 |       |                       | 2.149     | 0.370 | 0.895 |              |        |
| Fe4–N6A               | 2.235        | 2.120     | 0.370 | 0.733 |       |                       | 2.149     | 0.370 | 0.793 |              |        |
| Fe4–S4A               | 2.332        | 2.120     | 0.370 | 0.564 |       |                       | 2.149     | 0.370 | 0.610 |              |        |
| Fe4–CX                | 2.020        | 1.650     | 0.370 | 0.368 | 2.492 | 0.492                 | 1.689     | 0.370 | 0.409 | <b>2.706</b> | -0.294 |
| Fe5–S1B               | 2.311        | 2.120     | 0.370 | 0.597 |       |                       | 2.149     | 0.370 | 0.645 |              |        |

|         |       |       |       |       |       |       |       |       |       |              |        |
|---------|-------|-------|-------|-------|-------|-------|-------|-------|-------|--------------|--------|
| Fe5-N6A | 2.182 | 2.120 | 0.370 | 0.846 |       |       | 2.149 | 0.370 | 0.915 |              |        |
| Fe5-S4B | 2.227 | 2.120 | 0.370 | 0.749 |       |       | 2.149 | 0.370 | 0.810 |              |        |
| Fe5-CX  | 2.060 | 1.650 | 0.370 | 0.330 | 2.522 | 0.522 | 1.689 | 0.370 | 0.367 | <b>2.737</b> | -0.263 |
| Fe6-S1B | 2.219 | 2.120 | 0.370 | 0.765 |       |       | 2.149 | 0.370 | 0.828 |              |        |
| Fe6-S3B | 2.212 | 2.120 | 0.370 | 0.780 |       |       | 2.149 | 0.370 | 0.843 |              |        |
| Fe6-S2B | 2.103 | 2.120 | 0.370 | 1.047 |       |       | 2.149 | 0.370 | 1.132 |              |        |
| Fe6-CX  | 2.004 | 1.650 | 0.370 | 0.384 | 2.976 | 0.976 | 1.689 | 0.370 | 0.427 | <b>3.230</b> | 0.230  |
| Fe7-S3B | 2.219 | 2.120 | 0.370 | 0.765 |       |       | 2.149 | 0.370 | 0.828 |              |        |
| Fe7-S4B | 2.279 | 2.120 | 0.370 | 0.651 |       |       | 2.149 | 0.370 | 0.704 |              |        |
| Fe7-N6A | 2.278 | 2.120 | 0.370 | 0.652 |       |       | 2.149 | 0.370 | 0.706 |              |        |
| Fe7-CX  | 1.998 | 1.650 | 0.370 | 0.390 | 2.459 | 0.459 | 1.689 | 0.370 | 0.434 | <b>2.671</b> | -0.329 |

**Table S11** The bond valence analyses for Mo atom in FeMo-cofactor (1) from MoFe protein 3U7Q with resolution of 1.00 Å.

| Bond                  | $r_{ij}$ (Å) | $R_0$ (Å) | B (Å) | Bval  | Sum          | Diff.  |
|-----------------------|--------------|-----------|-------|-------|--------------|--------|
| expected valence = +2 |              |           |       |       |              |        |
| Mo–O5                 | 2.210        | 1.812     | 0.370 | 0.341 |              |        |
| Mo–O7                 | 2.177        | 1.812     | 0.370 | 0.373 |              |        |
| Mo–N                  | 2.347        | 1.948     | 0.370 | 0.340 |              |        |
| Mo–S1B                | 2.358        | 2.141     | 0.370 | 0.556 |              |        |
| Mo–S3B                | 2.371        | 2.141     | 0.370 | 0.537 |              |        |
| Mo–S4B                | 2.354        | 2.141     | 0.370 | 0.562 | 2.710        | 0.710  |
| expected valence = +3 |              |           |       |       |              |        |
| Mo–O5                 | 2.210        | 1.834     | 0.370 | 0.362 |              |        |
| Mo–O7                 | 2.177        | 1.834     | 0.370 | 0.396 |              |        |
| Mo–N                  | 2.347        | 1.972     | 0.370 | 0.363 |              |        |
| Mo–S1B                | 2.358        | 2.189     | 0.370 | 0.633 |              |        |
| Mo–S3B                | 2.371        | 2.189     | 0.370 | 0.611 |              |        |
| Mo–S4B                | 2.354        | 2.189     | 0.370 | 0.640 | <b>3.006</b> | 0.006  |
| expected valence = +4 |              |           |       |       |              |        |
| Mo–O5                 | 2.210        | 1.856     | 0.370 | 0.384 |              |        |
| Mo–O7                 | 2.177        | 1.856     | 0.370 | 0.420 |              |        |
| Mo–N                  | 2.347        | 1.996     | 0.370 | 0.387 |              |        |
| Mo–S1B                | 2.358        | 2.237     | 0.370 | 0.721 |              |        |
| Mo–S3B                | 2.371        | 2.237     | 0.370 | 0.696 |              |        |
| Mo–S4B                | 2.354        | 2.237     | 0.370 | 0.729 | 3.338        | -0.662 |

**Table S12** The bond valence analyses for Mo atom in FeMo-cofactor (2) from MoFe protein 3U7Q with resolution of 1.00 Å.

| Bond                  | $r_{ij}$ (Å) | $R_0$ (Å) | B (Å) | Bval  | Sum          | Diff.  |
|-----------------------|--------------|-----------|-------|-------|--------------|--------|
| expected valence = +2 |              |           |       |       |              |        |
| Mo–O5                 | 2.193        | 1.812     | 0.370 | 0.357 |              |        |
| Mo–O7                 | 2.164        | 1.812     | 0.370 | 0.386 |              |        |
| Mo–N                  | 2.332        | 1.948     | 0.370 | 0.354 |              |        |
| Mo–S1B                | 2.347        | 2.141     | 0.370 | 0.573 |              |        |
| Mo–S3B                | 2.367        | 2.141     | 0.370 | 0.543 |              |        |
| Mo–S4B                | 2.354        | 2.141     | 0.370 | 0.562 | 2.776        | 0.776  |
| expected valence = +3 |              |           |       |       |              |        |
| Mo–O5                 | 2.193        | 1.834     | 0.370 | 0.379 |              |        |
| Mo–O7                 | 2.164        | 1.834     | 0.370 | 0.410 |              |        |
| Mo–N                  | 2.332        | 1.972     | 0.370 | 0.378 |              |        |
| Mo–S1B                | 2.347        | 2.189     | 0.370 | 0.652 |              |        |
| Mo–S3B                | 2.367        | 2.189     | 0.370 | 0.618 |              |        |
| Mo–S4B                | 2.354        | 2.189     | 0.370 | 0.640 | <b>3.078</b> | 0.078  |
| expected valence = +4 |              |           |       |       |              |        |
| Mo–O6                 | 2.193        | 1.856     | 0.370 | 0.402 |              |        |
| Mo–O7                 | 2.164        | 1.856     | 0.370 | 0.435 |              |        |
| Mo–N                  | 2.332        | 1.996     | 0.370 | 0.403 |              |        |
| Mo–S1B                | 2.347        | 2.237     | 0.370 | 0.743 |              |        |
| Mo–S3B                | 2.367        | 2.237     | 0.370 | 0.704 |              |        |
| Mo–S4B                | 2.354        | 2.237     | 0.370 | 0.729 | 3.416        | -0.584 |



**Table S13** The bond valence analyses for Mo atom in FeMo-cofactor (1) from MoFe protein 4TKV with resolution of 1.50 Å.

| Bond                  | $r_{ij}$ (Å) | $R_0$ (Å) | B (Å) | Bval  | Sum          | Diff.  |
|-----------------------|--------------|-----------|-------|-------|--------------|--------|
| expected valence = +2 |              |           |       |       |              |        |
| Mo–O6                 | 2.166        | 1.812     | 0.370 | 0.384 |              |        |
| Mo–O7                 | 2.218        | 1.812     | 0.370 | 0.334 |              |        |
| Mo–N                  | 2.381        | 1.948     | 0.370 | 0.310 |              |        |
| Mo–S1B                | 2.323        | 2.141     | 0.370 | 0.611 |              |        |
| Mo–S3B                | 2.354        | 2.141     | 0.370 | 0.562 |              |        |
| Mo–S4B                | 2.336        | 2.141     | 0.370 | 0.590 | 2.792        | 0.792  |
| expected valence = +3 |              |           |       |       |              |        |
| Mo–O6                 | 2.166        | 1.834     | 0.370 | 0.408 |              |        |
| Mo–O7                 | 2.218        | 1.834     | 0.370 | 0.354 |              |        |
| Mo–N                  | 2.381        | 1.972     | 0.370 | 0.331 |              |        |
| Mo–S1B                | 2.323        | 2.189     | 0.370 | 0.696 |              |        |
| Mo–S3B                | 2.354        | 2.189     | 0.370 | 0.640 |              |        |
| Mo–S4B                | 2.336        | 2.189     | 0.370 | 0.672 | <b>3.101</b> | 0.101  |
| expected valence = +4 |              |           |       |       |              |        |
| Mo–O6                 | 2.166        | 1.856     | 0.370 | 0.433 |              |        |
| Mo–O7                 | 2.218        | 1.856     | 0.370 | 0.376 |              |        |
| Mo–N                  | 2.381        | 1.996     | 0.370 | 0.353 |              |        |
| Mo–S1B                | 2.323        | 2.237     | 0.370 | 0.793 |              |        |
| Mo–S3B                | 2.354        | 2.237     | 0.370 | 0.729 |              |        |
| Mo–S4B                | 2.336        | 2.237     | 0.370 | 0.765 | 3.449        | -0.551 |

**Table S14** The bond valence analyses for Mo atom in FeMo-cofactor (2) from MoFe protein 4TKV with resolution of 1.50 Å.

| Bond                  | $r_{ij}$ (Å) | $R_0$ (Å) | B (Å) | Bval  | Sum          | Diff.  |
|-----------------------|--------------|-----------|-------|-------|--------------|--------|
| expected valence = +2 |              |           |       |       |              |        |
| Mo–O5                 | 2.195        | 1.812     | 0.370 | 0.355 |              |        |
| Mo–O7                 | 2.190        | 1.812     | 0.370 | 0.360 |              |        |
| Mo–N                  | 2.394        | 1.948     | 0.370 | 0.300 |              |        |
| Mo–S1B                | 2.343        | 2.141     | 0.370 | 0.579 |              |        |
| Mo–S3B                | 2.346        | 2.141     | 0.370 | 0.575 |              |        |
| Mo–S4B                | 2.327        | 2.141     | 0.370 | 0.605 | 2.774        | 0.774  |
| expected valence = +3 |              |           |       |       |              |        |
| Mo–O5                 | 2.195        | 1.834     | 0.370 | 0.377 |              |        |
| Mo–O7                 | 2.190        | 1.834     | 0.370 | 0.382 |              |        |
| Mo–N                  | 2.394        | 1.972     | 0.370 | 0.320 |              |        |
| Mo–S1B                | 2.343        | 2.189     | 0.370 | 0.660 |              |        |
| Mo–S3B                | 2.346        | 2.189     | 0.370 | 0.654 |              |        |
| Mo–S4B                | 2.327        | 2.189     | 0.370 | 0.689 | <b>3.081</b> | 0.081  |
| expected valence = +4 |              |           |       |       |              |        |
| Mo–O6                 | 2.195        | 1.856     | 0.370 | 0.400 |              |        |
| Mo–O7                 | 2.190        | 1.856     | 0.370 | 0.405 |              |        |
| Mo–N                  | 2.394        | 1.996     | 0.370 | 0.341 |              |        |
| Mo–S1B                | 2.343        | 2.237     | 0.370 | 0.751 |              |        |
| Mo–S3B                | 2.346        | 2.237     | 0.370 | 0.745 |              |        |
| Mo–S4B                | 2.327        | 2.237     | 0.370 | 0.784 | 3.426        | -0.574 |

**Table S15** The bond valence analyses for Mo atom in FeMo-cofactor (1) from MoFe protein 7JRF with resolution of 1.33 Å.

| Bond                  | $r_{ij}$ (Å) | $R_0$ (Å) | B (Å) | Bval  | Sum          | Diff.  |
|-----------------------|--------------|-----------|-------|-------|--------------|--------|
| expected valence = +2 |              |           |       |       |              |        |
| Mo–O6                 | 2.191        | 1.812     | 0.370 | 0.359 |              |        |
| Mo–O7                 | 2.238        | 1.812     | 0.370 | 0.316 |              |        |
| Mo–N                  | 2.348        | 1.948     | 0.370 | 0.339 |              |        |
| Mo–S1B                | 2.339        | 2.141     | 0.370 | 0.586 |              |        |
| Mo–S3B                | 2.383        | 2.141     | 0.370 | 0.520 |              |        |
| Mo–S4B                | 2.363        | 2.141     | 0.370 | 0.549 | 2.669        | 0.669  |
| expected valence = +3 |              |           |       |       |              |        |
| Mo–O6                 | 2.191        | 1.834     | 0.370 | 0.381 |              |        |
| Mo–O7                 | 2.238        | 1.834     | 0.370 | 0.336 |              |        |
| Mo–N                  | 2.348        | 1.972     | 0.370 | 0.362 |              |        |
| Mo–S1B                | 2.339        | 2.189     | 0.370 | 0.667 |              |        |
| Mo–S3B                | 2.383        | 2.189     | 0.370 | 0.592 |              |        |
| Mo–S4B                | 2.363        | 2.189     | 0.370 | 0.625 | <b>2.962</b> | -0.038 |
| expected valence = +4 |              |           |       |       |              |        |
| Mo–O6                 | 2.191        | 1.856     | 0.370 | 0.404 |              |        |
| Mo–O7                 | 2.238        | 1.856     | 0.370 | 0.356 |              |        |
| Mo–N                  | 2.348        | 1.996     | 0.370 | 0.386 |              |        |
| Mo–S1B                | 2.339        | 2.237     | 0.370 | 0.759 |              |        |
| Mo–S3B                | 2.383        | 2.237     | 0.370 | 0.674 |              |        |
| Mo–S4B                | 2.363        | 2.237     | 0.370 | 0.711 | 3.291        | -0.709 |

**Table S16** The bond valence analyses for Mo atom in FeMo-cofactor (2) from MoFe protein 7JRF with resolution of 1.33 Å.

| Bond                  | $r_{ij}$ (Å) | $R_0$ (Å) | B (Å) | Bval  | Sum          | Diff.  |
|-----------------------|--------------|-----------|-------|-------|--------------|--------|
| expected valence = +2 |              |           |       |       |              |        |
| Mo–O5                 | 2.191        | 1.812     | 0.370 | 0.359 |              |        |
| Mo–O7                 | 2.237        | 1.812     | 0.370 | 0.317 |              |        |
| Mo–N                  | 2.360        | 1.948     | 0.370 | 0.328 |              |        |
| Mo–S1B                | 2.337        | 2.141     | 0.370 | 0.589 |              |        |
| Mo–S3B                | 2.373        | 2.141     | 0.370 | 0.534 |              |        |
| Mo–S4B                | 2.359        | 2.141     | 0.370 | 0.555 | 2.682        | 0.682  |
| expected valence = +3 |              |           |       |       |              |        |
| Mo–O5                 | 2.191        | 1.834     | 0.370 | 0.381 |              |        |
| Mo–O7                 | 2.237        | 1.834     | 0.370 | 0.336 |              |        |
| Mo–N                  | 2.360        | 1.972     | 0.370 | 0.350 |              |        |
| Mo–S1B                | 2.337        | 2.189     | 0.370 | 0.670 |              |        |
| Mo–S3B                | 2.373        | 2.189     | 0.370 | 0.608 |              |        |
| Mo–S4B                | 2.359        | 2.189     | 0.370 | 0.632 | <b>2.978</b> | -0.022 |
| expected valence = +4 |              |           |       |       |              |        |
| Mo–O6                 | 2.191        | 1.856     | 0.370 | 0.404 |              |        |
| Mo–O7                 | 2.237        | 1.856     | 0.370 | 0.357 |              |        |
| Mo–N                  | 2.360        | 1.996     | 0.370 | 0.374 |              |        |
| Mo–S1B                | 2.337        | 2.237     | 0.370 | 0.763 |              |        |
| Mo–S3B                | 2.373        | 2.237     | 0.370 | 0.692 |              |        |
| Mo–S4B                | 2.359        | 2.237     | 0.370 | 0.719 | 3.310        | -0.690 |

**Table S17** The bond valence analyses for Mo atom in single N<sub>2</sub>-bound FeMo-cofactor (1) from MoFe protein 6UG0 with resolution of 1.83 Å. The valences in bracket are not included in valence sum.

| Bond                  | $r_{ij}$ (Å) | $R_0$ (Å) | B (Å) | Bval    | Sum          | Diff.  |
|-----------------------|--------------|-----------|-------|---------|--------------|--------|
| expected valence = +2 |              |           |       |         |              |        |
| Mo–O6                 | 2.727        | 1.812     | 0.370 | (0.084) |              |        |
| Mo–O7                 | 2.357        | 1.812     | 0.370 | 0.229   |              |        |
| Mo–N                  | 2.514        | 1.948     | 0.370 | 0.217   |              |        |
| Mo–S1B                | 2.330        | 2.141     | 0.370 | 0.600   |              |        |
| Mo–S3B                | 2.361        | 2.141     | 0.370 | 0.552   |              |        |
| Mo–S4B                | 2.380        | 2.141     | 0.370 | 0.524   | <b>2.122</b> | 0.122  |
| expected valence = +3 |              |           |       |         |              |        |
| Mo–O6                 | 2.727        | 1.834     | 0.370 | (0.090) |              |        |
| Mo–O7                 | 2.357        | 1.834     | 0.370 | 0.243   |              |        |
| Mo–N                  | 2.514        | 1.972     | 0.370 | 0.231   |              |        |
| Mo–S1B                | 2.330        | 2.189     | 0.370 | 0.683   |              |        |
| Mo–S3B                | 2.361        | 2.189     | 0.370 | 0.628   |              |        |
| Mo–S4B                | 2.380        | 2.189     | 0.370 | 0.597   | 2.383        | -0.617 |
| expected valence = +4 |              |           |       |         |              |        |
| Mo–O6                 | 2.727        | 1.856     | 0.370 | (0.095) |              |        |
| Mo–O7                 | 2.357        | 1.856     | 0.370 | 0.258   |              |        |
| Mo–N                  | 2.514        | 1.996     | 0.370 | 0.247   |              |        |
| Mo–S1B                | 2.330        | 2.237     | 0.370 | 0.778   |              |        |
| Mo–S3B                | 2.361        | 2.237     | 0.370 | 0.715   |              |        |
| Mo–S4B                | 2.380        | 2.237     | 0.370 | 0.679   | 2.677        | -1.323 |

**Table S18** The bond valence analyses for Mo atom in double N<sub>2</sub>-bound FeMo-cofactor (2) from MoFe protein 6UG0 with resolution of 1.83 Å. The valences in bracket are not included in valence sum.

| Bond                  | $r_{ij}$ (Å) | $R_0$ (Å) | B (Å) | Bval    | Sum          | Diff.  |
|-----------------------|--------------|-----------|-------|---------|--------------|--------|
| expected valence = +2 |              |           |       |         |              |        |
| Mo–O5                 | 2.323        | 1.812     | 0.370 | 0.251   |              |        |
| Mo–O7                 | 2.736        | 1.812     | 0.370 | (0.082) |              |        |
| Mo–N                  | 2.361        | 1.948     | 0.370 | 0.328   |              |        |
| Mo–S1B                | 2.380        | 2.141     | 0.370 | 0.524   |              |        |
| Mo–S3B                | 2.331        | 2.141     | 0.370 | 0.598   |              |        |
| Mo–S4B                | 2.361        | 2.141     | 0.370 | 0.552   | <b>2.084</b> | 0.084  |
| expected valence = +3 |              |           |       |         |              |        |
| Mo–O5                 | 2.323        | 1.834     | 0.370 | 0.267   |              |        |
| Mo–O7                 | 2.736        | 1.834     | 0.370 | (0.087) |              |        |
| Mo–N                  | 2.361        | 1.972     | 0.370 | 0.349   |              |        |
| Mo–S1B                | 2.380        | 2.189     | 0.370 | 0.597   |              |        |
| Mo–S3B                | 2.331        | 2.189     | 0.370 | 0.681   |              |        |
| Mo–S4B                | 2.361        | 2.189     | 0.370 | 0.628   | 2.343        | -0.657 |
| expected valence = +4 |              |           |       |         |              |        |
| Mo–O6                 | 2.323        | 1.856     | 0.370 | 0.283   |              |        |
| Mo–O7                 | 2.736        | 1.856     | 0.370 | (0.093) |              |        |
| Mo–N                  | 2.361        | 1.996     | 0.370 | 0.373   |              |        |
| Mo–S1B                | 2.380        | 2.237     | 0.370 | 0.679   |              |        |
| Mo–S3B                | 2.331        | 2.237     | 0.370 | 0.776   |              |        |
| Mo–S4B                | 2.361        | 2.237     | 0.370 | 0.715   | 2.636        | -1.364 |

**Table S19** The bond valence analyses for Mo atom in FeMo-cofactor (1) from MoFe protein 6UG0 with single N<sub>2</sub> refined as S atom with resolution of 1.83 Å.<sup>1</sup>

| Bond                  | $r_{ij}$ (Å) | $R_0$ (Å) | B (Å) | Bval  | Sum          | Diff.  |
|-----------------------|--------------|-----------|-------|-------|--------------|--------|
| expected valence = +2 |              |           |       |       |              |        |
| Mo–O6                 | 2.163        | 1.812     | 0.370 | 0.387 |              |        |
| Mo–O7                 | 2.129        | 1.812     | 0.370 | 0.425 |              |        |
| Mo–N                  | 2.266        | 1.948     | 0.370 | 0.423 |              |        |
| Mo–S1B                | 2.367        | 2.141     | 0.370 | 0.543 |              |        |
| Mo–S3B                | 2.376        | 2.141     | 0.370 | 0.530 |              |        |
| Mo–S4B                | 2.387        | 2.141     | 0.370 | 0.514 | 2.822        | 0.822  |
| expected valence = +3 |              |           |       |       |              |        |
| Mo–O6                 | 2.163        | 1.834     | 0.370 | 0.411 |              |        |
| Mo–O7                 | 2.129        | 1.834     | 0.370 | 0.451 |              |        |
| Mo–N                  | 2.266        | 1.972     | 0.370 | 0.452 |              |        |
| Mo–S1B                | 2.367        | 2.189     | 0.370 | 0.618 |              |        |
| Mo–S3B                | 2.376        | 2.189     | 0.370 | 0.603 |              |        |
| Mo–S4B                | 2.387        | 2.189     | 0.370 | 0.586 | <b>3.120</b> | 0.120  |
| expected valence = +4 |              |           |       |       |              |        |
| Mo–O6                 | 2.163        | 1.856     | 0.370 | 0.436 |              |        |
| Mo–O7                 | 2.129        | 1.856     | 0.370 | 0.478 |              |        |
| Mo–N                  | 2.266        | 1.996     | 0.370 | 0.482 |              |        |
| Mo–S1B                | 2.367        | 2.237     | 0.370 | 0.704 |              |        |
| Mo–S3B                | 2.376        | 2.237     | 0.370 | 0.687 |              |        |
| Mo–S4B                | 2.387        | 2.237     | 0.370 | 0.667 | 3.454        | -0.546 |

**Table S20** The bond valence analyses for Mo atom in FeMo-cofactor (2) from MoFe protein 6UG0 with double N<sub>2</sub> refined as S atoms with resolution of 1.83 Å.<sup>1</sup>

| Bond                  | $r_{ij}$ (Å) | $R_0$ (Å) | B (Å) | Bval  | Sum          | Diff.  |
|-----------------------|--------------|-----------|-------|-------|--------------|--------|
| expected valence = +2 |              |           |       |       |              |        |
| Mo–O6                 | 2.104        | 1.812     | 0.370 | 0.454 |              |        |
| Mo–O7                 | 2.108        | 1.812     | 0.370 | 0.449 |              |        |
| Mo–N                  | 2.299        | 1.948     | 0.370 | 0.387 |              |        |
| Mo–S1B                | 2.425        | 2.141     | 0.370 | 0.464 |              |        |
| Mo–S3B                | 2.321        | 2.141     | 0.370 | 0.615 |              |        |
| Mo–S4B                | 2.396        | 2.141     | 0.370 | 0.502 | 2.872        | 0.872  |
| expected valence = +3 |              |           |       |       |              |        |
| Mo–O6                 | 2.104        | 1.834     | 0.370 | 0.482 |              |        |
| Mo–O7                 | 2.108        | 1.834     | 0.370 | 0.477 |              |        |
| Mo–N                  | 2.299        | 1.972     | 0.370 | 0.413 |              |        |
| Mo–S1B                | 2.425        | 2.189     | 0.370 | 0.528 |              |        |
| Mo–S3B                | 2.321        | 2.189     | 0.370 | 0.700 |              |        |
| Mo–S4B                | 2.396        | 2.189     | 0.370 | 0.572 | <b>3.172</b> | 0.172  |
| expected valence = +4 |              |           |       |       |              |        |
| Mo–O6                 | 2.104        | 1.856     | 0.370 | 0.512 |              |        |
| Mo–O7                 | 2.108        | 1.856     | 0.370 | 0.506 |              |        |
| Mo–N                  | 2.299        | 1.996     | 0.370 | 0.441 |              |        |
| Mo–S1B                | 2.425        | 2.237     | 0.370 | 0.602 |              |        |
| Mo–S3B                | 2.321        | 2.237     | 0.370 | 0.797 |              |        |
| Mo–S4B                | 2.396        | 2.237     | 0.370 | 0.651 | 3.508        | -0.492 |



**Table S21** The assumed bond valence analyses of Mo atom in 6UG0 if we replace the Mo–O distances by the corresponding bond distances of FeMo-cofactor in 3U7Q、4TKV、7JRF、1H1L and Mo<sup>3+</sup> inorganic complex.

| Bond                                                               | $r_{ij}$ (Å) | $R_0$ (Å) | B (Å) | Bval  | Sum          | Diff.  |
|--------------------------------------------------------------------|--------------|-----------|-------|-------|--------------|--------|
| expected valence = +3 (Mo–O distances substituted by data in 3U7Q) |              |           |       |       |              |        |
| <b>Mo–O5</b>                                                       | 2.193        | 1.834     | 0.370 | 0.379 |              |        |
| <b>Mo–O7</b>                                                       | 2.164        | 1.834     | 0.370 | 0.410 |              |        |
| Mo–N                                                               | 2.514        | 1.972     | 0.370 | 0.231 |              |        |
| Mo–S1B                                                             | 2.330        | 2.189     | 0.370 | 0.683 |              |        |
| Mo–S3B                                                             | 2.361        | 2.189     | 0.370 | 0.628 |              |        |
| Mo–S4B                                                             | 2.380        | 2.189     | 0.370 | 0.597 | <b>2.928</b> | -0.072 |
| <b>Mo–O5</b>                                                       | 2.210        | 1.834     | 0.370 | 0.362 |              |        |
| <b>Mo–O7</b>                                                       | 2.177        | 1.834     | 0.370 | 0.396 |              |        |
| Mo–N                                                               | 2.361        | 1.972     | 0.370 | 0.349 |              |        |
| Mo–S1B                                                             | 2.380        | 2.189     | 0.370 | 0.597 |              |        |
| Mo–S3B                                                             | 2.331        | 2.189     | 0.370 | 0.681 |              |        |
| Mo–S4B                                                             | 2.361        | 2.189     | 0.370 | 0.628 | <b>3.013</b> | 0.013  |
| expected valence = +3 (Mo–O distances substituted by data in 4TKV) |              |           |       |       |              |        |
| <b>Mo–O5</b>                                                       | 2.166        | 1.834     | 0.370 | 0.408 |              |        |
| <b>Mo–O7</b>                                                       | 2.218        | 1.834     | 0.370 | 0.354 |              |        |
| Mo–N                                                               | 2.514        | 1.972     | 0.370 | 0.231 |              |        |
| Mo–S1B                                                             | 2.330        | 2.189     | 0.370 | 0.683 |              |        |
| Mo–S3B                                                             | 2.361        | 2.189     | 0.370 | 0.628 |              |        |
| Mo–S4B                                                             | 2.380        | 2.189     | 0.370 | 0.597 | <b>2.901</b> | -0.099 |
| <b>Mo–O5</b>                                                       | 2.195        | 1.834     | 0.370 | 0.377 |              |        |
| <b>Mo–O7</b>                                                       | 2.190        | 1.834     | 0.370 | 0.382 |              |        |
| Mo–N                                                               | 2.361        | 1.972     | 0.370 | 0.349 |              |        |
| Mo–S1B                                                             | 2.380        | 2.189     | 0.370 | 0.597 |              |        |
| Mo–S3B                                                             | 2.331        | 2.189     | 0.370 | 0.681 |              |        |
| Mo–S4B                                                             | 2.361        | 2.189     | 0.370 | 0.628 | <b>3.015</b> | 0.015  |

expected valence = +3 (Mo–O distances substituted by data in 7JRF)

|              |       |       |       |       |              |        |
|--------------|-------|-------|-------|-------|--------------|--------|
| <b>Mo–O5</b> | 2.191 | 1.834 | 0.370 | 0.381 |              |        |
| <b>Mo–O7</b> | 2.237 | 1.834 | 0.370 | 0.336 |              |        |
| Mo–N         | 2.514 | 1.972 | 0.370 | 0.231 |              |        |
| Mo–S1B       | 2.330 | 2.189 | 0.370 | 0.683 |              |        |
| Mo–S3B       | 2.361 | 2.189 | 0.370 | 0.628 |              |        |
| Mo–S4B       | 2.380 | 2.189 | 0.370 | 0.597 | <b>2.857</b> | -0.143 |

|              |       |       |       |       |              |        |
|--------------|-------|-------|-------|-------|--------------|--------|
| <b>Mo–O5</b> | 2.191 | 1.834 | 0.370 | 0.381 |              |        |
| <b>Mo–O7</b> | 2.238 | 1.834 | 0.370 | 0.336 |              |        |
| Mo–N         | 2.361 | 1.972 | 0.370 | 0.349 |              |        |
| Mo–S1B       | 2.380 | 2.189 | 0.370 | 0.597 |              |        |
| Mo–S3B       | 2.331 | 2.189 | 0.370 | 0.681 |              |        |
| Mo–S4B       | 2.361 | 2.189 | 0.370 | 0.628 | <b>2.972</b> | -0.028 |

expected valence = +3 (Mo–O distances substituted by data in 1H1L)

|              |       |       |       |       |              |        |
|--------------|-------|-------|-------|-------|--------------|--------|
| <b>Mo–O5</b> | 2.269 | 1.834 | 0.370 | 0.309 |              |        |
| <b>Mo–O7</b> | 2.253 | 1.834 | 0.370 | 0.322 |              |        |
| Mo–N         | 2.514 | 1.972 | 0.370 | 0.231 |              |        |
| Mo–S1B       | 2.330 | 2.189 | 0.370 | 0.683 |              |        |
| Mo–S3B       | 2.361 | 2.189 | 0.370 | 0.628 |              |        |
| Mo–S4B       | 2.380 | 2.189 | 0.370 | 0.597 | <b>2.770</b> | -0.230 |

|              |       |       |       |       |              |        |
|--------------|-------|-------|-------|-------|--------------|--------|
| <b>Mo–O5</b> | 2.312 | 1.834 | 0.370 | 0.275 |              |        |
| <b>Mo–O7</b> | 2.251 | 1.834 | 0.370 | 0.324 |              |        |
| Mo–N         | 2.361 | 1.972 | 0.370 | 0.349 |              |        |
| Mo–S1B       | 2.380 | 2.189 | 0.370 | 0.597 |              |        |
| Mo–S3B       | 2.331 | 2.189 | 0.370 | 0.681 |              |        |
| Mo–S4B       | 2.361 | 2.189 | 0.370 | 0.628 | <b>2.854</b> | -0.146 |

expected valence = +3 (Mo–O distances substituted by average Mo<sup>3+</sup>–O in inorganic complex)

|              |       |       |       |       |  |  |
|--------------|-------|-------|-------|-------|--|--|
| <b>Mo–O5</b> | 2.165 | 1.834 | 0.370 | 0.409 |  |  |
| <b>Mo–O7</b> | 2.153 | 1.834 | 0.370 | 0.422 |  |  |
| Mo–N         | 2.514 | 1.972 | 0.370 | 0.231 |  |  |

|              |       |       |       |       |              |        |
|--------------|-------|-------|-------|-------|--------------|--------|
| Mo-S1B       | 2.330 | 2.189 | 0.370 | 0.683 |              |        |
| Mo-S3B       | 2.361 | 2.189 | 0.370 | 0.628 |              |        |
| Mo-S4B       | 2.380 | 2.189 | 0.370 | 0.597 | <b>2.970</b> | -0.030 |
| <b>Mo-O5</b> | 2.165 | 1.834 | 0.370 | 0.409 |              |        |
| <b>Mo-O7</b> | 2.153 | 1.834 | 0.370 | 0.422 |              |        |
| Mo-N         | 2.361 | 1.972 | 0.370 | 0.349 |              |        |
| Mo-S1B       | 2.380 | 2.189 | 0.370 | 0.597 |              |        |
| Mo-S3B       | 2.331 | 2.189 | 0.370 | 0.681 |              |        |
| Mo-S4B       | 2.361 | 2.189 | 0.370 | 0.628 | <b>3.087</b> | 0.087  |

---

**Table S22** The Mo–O ( $\alpha$ -alkoxy/ $\alpha$ -hydroxy) and Mo–O ( $\alpha$ -carboxy) distances (Å) of molybdenum  $\alpha$ -hydroxycarboxylate complexes for Mo<sup>n+</sup>–O linear fitting.

| Mo $\alpha$ -hydroxycarboxylate complex                                                                                                                                                     | Mo–O ( $\alpha$ -alkoxy/ $\alpha$ -hydroxy) | Mo–O ( $\alpha$ -Carboxy) |
|---------------------------------------------------------------------------------------------------------------------------------------------------------------------------------------------|---------------------------------------------|---------------------------|
| <b>Mo<sup>0</sup></b>                                                                                                                                                                       | H <sup>a</sup> /O <sub>t</sub> <sup>b</sup> | O <sub>t</sub>            |
| (Et <sub>4</sub> N) <sub>3</sub> [(Hcit)Mo(CO) <sub>3</sub> ] <sup>2</sup>                                                                                                                  | 2.230(2) (H)                                | 2.229(2)                  |
| (Et <sub>4</sub> N) <sub>2</sub> [(Hmal)Mo(CO) <sub>3</sub> ] <sup>2</sup>                                                                                                                  | 2.286(3) (H)                                | 2.255(3)                  |
| <b>Average</b>                                                                                                                                                                              | <b>2.258</b>                                | <b>2.242</b>              |
| <b>Mo<sup>4+</sup></b>                                                                                                                                                                      | H/O <sub>t</sub>                            | O <sub>t</sub>            |
| [Mo <sub>2</sub> O(Hcit) <sub>2</sub> (tpy) <sub>2</sub> ]·3H <sub>2</sub> O <sup>3</sup>                                                                                                   | 1.966(2)                                    | 2.113(2)                  |
|                                                                                                                                                                                             | 1.978(2)                                    | 2.097(2)                  |
| Na <sub>2</sub> [Mo <sub>3</sub> SO <sub>3</sub> ( <i>R,S</i> -lact) <sub>3</sub> (im) <sub>3</sub> ]·10H <sub>2</sub> O <sup>4</sup>                                                       | 1.994(6)                                    | 2.135(6)                  |
|                                                                                                                                                                                             | 2.003(6)                                    | 2.131(6)                  |
|                                                                                                                                                                                             | 1.999(7)                                    | 2.133(6)                  |
| [Mo <sub>3</sub> S <sub>4</sub> (PPh <sub>3</sub> ) <sub>3</sub> (Hlac) <sub>2</sub> (lac)] <sup>5</sup>                                                                                    | 2.092(3)                                    | 2.228(4) (H)              |
|                                                                                                                                                                                             |                                             | 2.179(4) (H)              |
|                                                                                                                                                                                             |                                             | 2.080(4)                  |
| Na <sub>2</sub> [Mo <sub>3</sub> ( $\mu_3$ -S)( $\mu_2$ -O) <sub>3</sub> (glyc) <sub>3</sub> (2-mim) <sub>3</sub> ]·1.5H <sub>2</sub> O <sup>6</sup>                                        | 1.991(6)                                    | 2.171(6)                  |
|                                                                                                                                                                                             | 2.001(6)                                    | 2.160(6)                  |
|                                                                                                                                                                                             | 2.011(5)                                    | 2.187(5)                  |
|                                                                                                                                                                                             | 2.011(5)                                    | 2.173(5)                  |
| (4-Hmim) <sub>6</sub> [Mo <sub>3</sub> ( $\mu_3$ -S)( $\mu_2$ -O) <sub>3</sub> (glyc) <sub>3</sub> (4-mim) <sub>3</sub> ] <sub>2</sub> [MoO <sub>2</sub> (glyc) <sub>2</sub> ] <sup>6</sup> | 2.017(4)                                    | 2.140(4)                  |
|                                                                                                                                                                                             | 2.003(4)                                    | 2.141(4)                  |
|                                                                                                                                                                                             | 2.014(4)                                    | 2.157(5)                  |
|                                                                                                                                                                                             | 2.011(3)                                    | 2.125(3)                  |
|                                                                                                                                                                                             | 2.008(3)                                    | 2.120(4)                  |
|                                                                                                                                                                                             | 2.016(3)                                    | 2.145(4)                  |
| Na <sub>3</sub> (4-Hmim)[Mo <sub>3</sub> ( $\mu_3$ -S)( $\mu_2$ -O) <sub>3</sub> (SO <sub>3</sub> )(glyc) <sub>3</sub> (4-mim)]·8H <sub>2</sub> O <sup>6</sup>                              | 2.027(2)                                    | 2.146(2)                  |
|                                                                                                                                                                                             | 1.994(2)                                    | 2.140(2)                  |
|                                                                                                                                                                                             | 2.028(2)                                    | 2.148(2)                  |
| [Mo <sub>3</sub> SO <sub>3</sub> (glyc) <sub>2</sub> (im) <sub>5</sub> ]·im·H <sub>2</sub> O <sup>4</sup>                                                                                   | 1.984(2)                                    | 2.123(2)                  |
| <b>Average</b>                                                                                                                                                                              | <b>2.007</b>                                | <b>2.137</b>              |
| <b>Mo<sup>5+</sup></b>                                                                                                                                                                      | H/O <sub>t</sub>                            | O <sub>t</sub>            |
| <i>trans</i> -[(MoO) <sub>2</sub> O(H <sub>2</sub> homocit) <sub>2</sub> (bpy) <sub>2</sub> ] <sub>4</sub> ·H <sub>2</sub> O <sup>7</sup>                                                   | 1.950                                       | 2.066                     |
|                                                                                                                                                                                             | 1.956                                       | 2.067                     |
| K <sub>2.5</sub> Na <sub>2</sub> NH <sub>4</sub> [Mo <sub>2</sub> O <sub>2</sub> S <sub>2</sub> (cit) <sub>2</sub> ]·5H <sub>2</sub> O <sup>8</sup>                                         | 2.028                                       | 2.135                     |
|                                                                                                                                                                                             | 2.013                                       | 2.124                     |
| (MeNC <sub>5</sub> H <sub>5</sub> ) <sub>4</sub> [Mo <sub>4</sub> O <sub>8</sub> (cit) <sub>2</sub> ]·2H <sub>2</sub> O <sup>9</sup>                                                        |                                             | 2.137(2)                  |
| [(MoO) <sub>2</sub> O(H <sub>2</sub> cit) <sub>2</sub> (bpy) <sub>2</sub> ]·4H <sub>2</sub> O <sup>10</sup>                                                                                 | 1.976(3)                                    | 2.077(3)                  |
|                                                                                                                                                                                             | 1.987(3)                                    | 2.075(3)                  |
| K <sub>4</sub> (NH <sub>4</sub> ) <sub>2</sub> [Mo <sub>2</sub> O <sub>2</sub> S <sub>2</sub> (cit) <sub>2</sub> ]·10H <sub>2</sub> O <sup>11</sup>                                         | 1.975(8) (O <sub>t</sub> )                  | 2.199(9)                  |
| K <sub>5</sub> (NH <sub>4</sub> ) <sub>4</sub> [Mo <sub>2</sub> O <sub>2</sub> S <sub>2</sub> (cit) <sub>2</sub> ]·CH <sub>3</sub> OH·5H <sub>2</sub> O <sup>12</sup>                       | 1.993 (O <sub>t</sub> )                     | 2.174                     |
|                                                                                                                                                                                             | 1.995 (O <sub>t</sub> )                     | 2.210                     |
| K <sub>5</sub> [Mo <sub>2</sub> O <sub>2</sub> S <sub>2</sub> (Hcit)(cit)]·6H <sub>2</sub> O·CH <sub>3</sub> OH                                                                             | 2.037 (O <sub>t</sub> )                     | 2.222                     |

|                                                                                                                                                                              |              |                            |                      |
|------------------------------------------------------------------------------------------------------------------------------------------------------------------------------|--------------|----------------------------|----------------------|
|                                                                                                                                                                              |              | 1.970 (O <sub>t</sub> )    | 2.182                |
| Na <sub>6</sub> [(Mo <sub>2</sub> O <sub>4</sub> ) <sub>3</sub> (mal) <sub>4</sub> ]·5H <sub>2</sub> O <sup>4</sup>                                                          | Bridged      |                            | 2.113(11)            |
| <i>trans</i> -[(MoO) <sub>2</sub> O(lact) <sub>2</sub> (bpy) <sub>2</sub> ]·3H <sub>2</sub> O <sup>14</sup>                                                                  | 1.941(6)     |                            | 2.031(7)             |
|                                                                                                                                                                              | 1.965(5)     |                            | 2.070(6)             |
| <i>trans</i> -[(MoO) <sub>2</sub> O(lact) <sub>2</sub> (phen) <sub>2</sub> ]·4H <sub>2</sub> O                                                                               | 1.959(2)     |                            | 2.065(2)             |
| <sup>14</sup>                                                                                                                                                                | 1.954(2)     |                            | 2.061(2)             |
| [(MoO) <sub>2</sub> O(glyc) <sub>2</sub> (bpy) <sub>2</sub> ]·3H <sub>2</sub> O <sup>14</sup>                                                                                | 1.962(3)     |                            | 2.077(4)             |
|                                                                                                                                                                              | 1.954(3)     |                            | 2.056(4)             |
| (PyH) <sub>2</sub> [Mo <sub>2</sub> O <sub>4</sub> (glyc) <sub>2</sub> Py <sub>2</sub> ] <sup>15</sup>                                                                       |              | 2.183(2) (O <sub>t</sub> ) | 2.092(2)             |
| (PyH) <sub>4</sub> [Mo <sub>4</sub> O <sub>8</sub> Cl <sub>4</sub> (glyc) <sub>2</sub> ]·2EtOH <sup>15</sup>                                                                 | Bridged      |                            | 2.117(3)             |
| [Mo <sub>4</sub> O <sub>8</sub> (glyc) <sub>2</sub> Py <sub>4</sub> ] <sup>15</sup>                                                                                          | Bridged      |                            | 2.046(3)             |
| (NH <sub>4</sub> ) <sub>6</sub> [Mo <sub>2</sub> O <sub>4</sub> (cit) <sub>2</sub> ]·3H <sub>2</sub> O <sup>16</sup>                                                         |              | 2.016(4) (O <sub>t</sub> ) | 2.152(3)             |
| <b>Average</b>                                                                                                                                                               | <b>1.970</b> | <b>2.024</b>               | <b>2.111</b>         |
| <b>Mo<sup>6+</sup></b>                                                                                                                                                       |              | <b>H/O<sub>t</sub></b>     | <b>O<sub>t</sub></b> |
| (H <sub>2</sub> tpy) <sub>2</sub> [Mo <sup>VI</sup> O <sub>5</sub> (Hcit) <sub>2</sub> ]·7.5H <sub>2</sub> O <sup>3</sup>                                                    | 1.953(3)     |                            | 2.204(3)             |
|                                                                                                                                                                              | 1.971(3)     |                            | 2.231(3)             |
| K <sub>5</sub> [(MoO <sub>2</sub> ) <sub>4</sub> O <sub>3</sub> ( <i>R,S</i> -Hhomocit) <sub>2</sub> ]Cl·5H <sub>2</sub> O <sup>17</sup>                                     | 1.935(4)     |                            | 2.194(5)             |
|                                                                                                                                                                              | 1.957(5)     |                            | 2.191(5)             |
| K <sub>2</sub> (NH <sub>4</sub> ) <sub>2</sub> [(MoO <sub>2</sub> ) <sub>4</sub> O <sub>3</sub> ( <i>R,S</i> -Hhomocit) <sub>2</sub> ]·6H <sub>2</sub> O <sup>17</sup>       | 1.955(4)     |                            | 2.194(4)             |
|                                                                                                                                                                              | 1.929(4)     |                            | 2.181(4)             |
| K <sub>2</sub> [MoO <sub>2</sub> ( <i>R,S</i> -H <sub>2</sub> homocit) <sub>2</sub> ]·2H <sub>2</sub> O <sup>18</sup>                                                        | 1.961(1)     |                            | 2.211(1)             |
|                                                                                                                                                                              | 2.007(1)     |                            | 2.206(1)             |
| K <sub>2</sub> {Mo <sup>IV</sup> <sub>3</sub> O <sub>4</sub> (im) <sub>3</sub> [Mo <sup>VI</sup> O <sub>3</sub> (Hcit) <sub>2</sub> ]}·3im·4H <sub>2</sub> O <sup>7</sup>    | Bridged      |                            | 2.104(5)             |
|                                                                                                                                                                              |              |                            | 2.097(4)             |
| (Him) <sub>2</sub> {Mo <sup>IV</sup> <sub>3</sub> O <sub>4</sub> (im) <sub>3</sub> [Mo <sup>VI</sup> O <sub>3</sub> (Hcit) <sub>2</sub> ]}·im·6H <sub>2</sub> O <sup>7</sup> | Bridged      |                            | 2.103(4)             |
|                                                                                                                                                                              |              |                            | 2.104(4)             |
| {(C <sub>6</sub> H <sub>5</sub> ) <sub>4</sub> P} [MoO <sub>2</sub> Cl(H <sub>2</sub> cit)] <sup>9</sup>                                                                     | 1.922(3)     |                            | 2.204(3)             |
| (PyH) <sub>2</sub> [MoO <sub>2</sub> (H <sub>2</sub> cit) <sub>2</sub> ]·Py <sup>9</sup>                                                                                     | 1.940(2)     |                            | 2.181(2)             |
|                                                                                                                                                                              | 1.951(2)     |                            | 2.211(2)             |
| (PyH) <sub>4</sub> {[MoO <sub>2</sub> (Hcit)] <sub>2</sub> (μ <sub>2</sub> -O)}·2Py <sup>9</sup>                                                                             | 1.984(1)     |                            | 2.205(1)             |
| (PyH) <sub>4</sub> [Mo <sub>4</sub> O <sub>11</sub> (Hcit) <sub>2</sub> ]·2H <sub>2</sub> O·1/2CH <sub>3</sub> O                                                             | 1.984(3)     |                            | 2.219(3)             |
| H <sup>9</sup>                                                                                                                                                               | 1.973(3)     |                            | 2.255(3)             |
| (PyH) <sub>6</sub> [Mo <sub>4</sub> O <sub>11</sub> (Hcit) <sub>2</sub> ]Cl <sub>2</sub> ·H <sub>2</sub> O·3/2CH <sub>3</sub> OH <sup>9</sup>                                | 1.967(5)     |                            | 2.197(4)             |
|                                                                                                                                                                              | 2.010(4)     |                            | 2.188(4)             |
| K <sub>4</sub> [MoO(O <sub>2</sub> ) <sub>2</sub> (cit)]·4H <sub>2</sub> O <sup>19</sup>                                                                                     | 1.971(2)     |                            | 2.232(3)             |
| K <sub>5</sub> [MoO(O <sub>2</sub> ) <sub>2</sub> (Hcit)H(Hcit)(O <sub>2</sub> ) <sub>2</sub> OMo]·6H <sub>2</sub> O <sup>19</sup>                                           | 2.034(2)     |                            | 2.197(2)             |
| [Mo <sub>4</sub> O <sub>11</sub> (cit) <sub>2</sub> ](Me <sub>3</sub> N(CH <sub>2</sub> ) <sub>6</sub> NMe <sub>3</sub> ) <sub>2</sub> ·12H <sub>2</sub> O <sup>20</sup>     | 1.969        |                            | 2.216                |
| [(MoO <sub>2</sub> ) <sub>2</sub> O(H <sub>2</sub> cit)(phen)(H <sub>2</sub> O) <sub>2</sub> ]·H <sub>2</sub> O                                                              | 1.943(5)     |                            | 2.208(5)             |
| <sup>10</sup>                                                                                                                                                                |              |                            |                      |
| [MoO <sub>2</sub> (H <sub>2</sub> cit)]·H <sub>2</sub> O <sup>10</sup>                                                                                                       | 1.907(6)     |                            | 2.144(6)             |
| K <sub>4</sub> [MoO <sub>3</sub> (cit)]·2H <sub>2</sub> O <sup>21</sup>                                                                                                      |              | 2.051 (O <sub>t</sub> )    | 2.237                |
| K <sub>4</sub> [(MoO <sub>2</sub> ) <sub>2</sub> O(Hcit) <sub>2</sub> ]·4H <sub>2</sub> O <sup>21</sup>                                                                      | 1.958        |                            | 2.210                |

|                                                                                  |          |                    |          |
|----------------------------------------------------------------------------------|----------|--------------------|----------|
| $K[(MoO_2)_2(OH)(H_2cit)_2] \cdot 4H_2O^{16}$                                    | 1.953(5) |                    | 2.249(5) |
| $(NH_4)_2[MoO_2(H_2cit)_2] \cdot H_2O^{22}$                                      | 1.986(1) |                    | 2.216(1) |
|                                                                                  | 1.938(1) |                    | 2.195(1) |
| $(NH_4)_3[MoO_2(H_2cit)(Hcit)] \cdot H_2O^{22}$                                  | 1.939(2) |                    | 2.197(2) |
|                                                                                  | 1.937(2) |                    | 2.221(2) |
| $(NH_4)_5[MoO_2(Hcit)(cit)] \cdot 2.5H_2O^{22}$                                  | 1.956(2) |                    | 2.228(2) |
|                                                                                  | 1.956(2) |                    | 2.162(2) |
| $K_2(NH_4)_2[(MoO_2)_4O_3(Hcit)_2] \cdot 5H_2O^{23}$                             | 1.949(5) |                    | 2.215(5) |
|                                                                                  | 1.977(5) |                    | 2.188(5) |
| $(NH_4)_5[(MoO_2)_4O_3(Hcit)(cit)] \cdot 3H_2O^{23}$                             | 1.931(4) |                    | 2.242(4) |
|                                                                                  | 1.931(4) |                    | 2.188(4) |
| $K_2(NH_4)_4[(MoO_2)_4O_3(cit)_2] \cdot 7H_2O^{23}$                              | 1.954(2) |                    | 2.204(3) |
|                                                                                  | 1.957(2) |                    | 2.211(3) |
| $K_2[(MoO_2)_2O(H_2cit)_2] \cdot 4H_2O^{23}$                                     | 1.919(2) |                    | 2.178(3) |
| $(NH_4)_3[(MoO_2)_2O(H_2cit)(Hcit)]^{23}$                                        | 1.931(2) |                    | 2.168(2) |
| $(NH_4)_{14}\{[(MoO_2)_2O(Hcit)_2][(MoO_2)_2O(Hcit)(cit)]_2\} \cdot 14H_2O^{23}$ | 1.977(2) |                    | 2.218(2) |
|                                                                                  | 1.948(2) |                    | 2.196(2) |
|                                                                                  | 1.949(2) |                    | 2.211(2) |
|                                                                                  | 1.953(2) |                    | 2.222(2) |
|                                                                                  | 1.948(2) |                    | 2.212(2) |
|                                                                                  | 1.977(2) |                    | 2.226(2) |
| $(NH_4)_6[(MoO_2)_2O(cit)_2] \cdot 3.5H_2O^{23}$                                 | 1.937(2) |                    | 2.220(3) |
|                                                                                  | 1.974(2) |                    | 2.204(2) |
|                                                                                  | 1.980(2) |                    | 2.184(2) |
|                                                                                  | 1.961(3) |                    | 2.240(3) |
| $(NH_4)_4[MoO_3(cit)] \cdot 2H_2O^{23}$                                          |          | 2.054(1) ( $O_t$ ) | 2.213(2) |
| $K_6[\{MoO_2(cit)\}_2O] \cdot 2H_2O^{24}$                                        | 1.952    |                    | 2.215    |
| $K_6[Mo_2O_5(cit)_2] \cdot 5H_2O^{25}$                                           | 1.966    |                    | 2.178    |
|                                                                                  | 1.981    |                    | 2.209    |
| $K_2Na_4[(MoO_2)_2O(cit)_2] \cdot 5H_2O^{26}$                                    | 1.929    |                    | 2.218    |
|                                                                                  | 1.958    |                    | 2.196    |
| $(Et_4N)[Mo^{VI}O_2Cl(H_2cit)] \cdot H_2O^7$                                     | 1.931(4) |                    | 2.178(3) |
| $Na_2[MoO_2(H_2cit)_2] \cdot 3H_2O^{27}$                                         | 1.953    |                    | 2.190    |
|                                                                                  | 1.960    |                    | 2.246    |
| $Na_6[Mo_2O_5(cit)_2] \cdot 10.5H_2O^{28}$                                       | 1.955(2) |                    | 2.181(2) |
|                                                                                  | 1.967(2) |                    | 2.229(2) |
| $trans\text{-}[(MoO)_2O(Hmal)_2(phen)_2] \cdot 4H_2O^{14}$                       | 1.964(4) | 2.072(4)           |          |
|                                                                                  | 1.958(4) | 2.081(4)           |          |
| $(NH_4)_4Mo_4O_{11}(mal)_2 \cdot 6H_2O^{29}$                                     | 1.999    |                    | 2.208    |
| $Cs_2[MoO_2(Hmal)_2] \cdot H_2O^{30}$                                            | 1.935    |                    | 2.242(H) |
| $[Et_4N]_2[Mo_2O_5(Hmal)_2(H_2O)_2]^{28}$                                        | 1.989(4) |                    | 2.222(4) |
| $K_{2n}[MoO(O_2)_2(S\text{-}Hmal)]_n \cdot nH_2O^{19}$                           | 2.011(4) |                    | 2.277(4) |
| $K_8[(MoO_2)_2O(R\text{-}mal)_2][(MoO_2)_2O(S\text{-}mal)_2] \cdot 4H_2O^{31}$   | 1.926(3) |                    | 2.238(2) |

|                                                                                                                                                                                                                                    |              |              |              |
|------------------------------------------------------------------------------------------------------------------------------------------------------------------------------------------------------------------------------------|--------------|--------------|--------------|
| (Him) <sub>2</sub> K <sub>6</sub> [(MoO <sub>2</sub> ) <sub>4</sub> O <sub>3</sub> ( <i>R</i> -mal) <sub>2</sub> ][(MoO <sub>2</sub> ) <sub>4</sub> O <sub>3</sub> ( <i>S</i> -mal) <sub>2</sub> ]·8H <sub>2</sub> O <sup>31</sup> | 1.961(2)     |              | 2.188(2)     |
| Na <sub>3</sub> [MoO <sub>2</sub> H( <i>S</i> -mal) <sub>2</sub> ] <sup>32</sup>                                                                                                                                                   | 1.963(2)     |              | 2.183(2)     |
| trans-[(MoO) <sub>2</sub> O(Hmal) <sub>2</sub> (bpy) <sub>2</sub> ] <sup>14</sup>                                                                                                                                                  | 1.935        |              | 2.181        |
| (NH <sub>4</sub> ) <sub>4</sub> [(MoO <sub>2</sub> ) <sub>4</sub> O <sub>3</sub> (mal) <sub>2</sub> ]·H <sub>2</sub> O <sup>33</sup>                                                                                               | 1.950(4)     |              | 2.074(4)     |
| (NH <sub>4</sub> ) <sub>4</sub> [(MoO <sub>2</sub> ) <sub>4</sub> O <sub>3</sub> ( <i>R</i> -mal) <sub>2</sub> ]·6H <sub>2</sub> O <sup>34</sup>                                                                                   | 2.225        |              | 2.511        |
| {Na <sub>2</sub> [MoO <sub>2</sub> ( <i>S</i> -lact) <sub>2</sub> ]} <sub>3</sub> ·13H <sub>2</sub> O <sup>35</sup>                                                                                                                | 1.925        |              | 2.227        |
|                                                                                                                                                                                                                                    | 1.969(5)     |              | 2.201(5)     |
|                                                                                                                                                                                                                                    | 1.947(4)     |              | 2.181(4)     |
|                                                                                                                                                                                                                                    | 1.951(4)     |              | 2.206(4)     |
| K <sub>6</sub> [(MoO <sub>2</sub> ) <sub>8</sub> (glyc) <sub>6</sub> (Hglyc) <sub>2</sub> ]·10H <sub>2</sub> O <sup>35</sup>                                                                                                       | 1.984(7)     | 2.075(6)     |              |
|                                                                                                                                                                                                                                    |              | 2.057(5)     |              |
|                                                                                                                                                                                                                                    |              | 2.061(5)     |              |
| K <sub>2</sub> [MoO <sub>2</sub> (glyc) <sub>2</sub> ]·H <sub>2</sub> O <sup>35</sup>                                                                                                                                              | 1.929(3)     |              | 2.202(2)     |
|                                                                                                                                                                                                                                    | 1.953(2)     |              | 2.204(2)     |
| MoO <sub>2</sub> (glyc)(bpy) <sup>14</sup>                                                                                                                                                                                         | 1.921(3)     |              | 2.133(3)     |
| (NH <sub>4</sub> ) <sub>2</sub> [MoO(O <sub>2</sub> ) <sub>2</sub> (glyc)]·0.5EtOH <sup>36</sup>                                                                                                                                   | 1.974(2)     |              | 2.310(2)     |
|                                                                                                                                                                                                                                    | 2.011(2)     |              | 2.211(2)     |
| K <sub>2</sub> [MoO(O <sub>2</sub> )(glyc)]·2H <sub>2</sub> O <sup>37</sup>                                                                                                                                                        | 1.991        |              | 2.239        |
| {(C <sub>6</sub> H <sub>5</sub> ) <sub>4</sub> P}[MoO <sub>2</sub> (glyc)(Hglyc)] <sup>15</sup>                                                                                                                                    | 1.945(1)     |              | 2.271(4)     |
| <b>Average</b>                                                                                                                                                                                                                     | <b>1.961</b> | <b>2.053</b> | <b>2.084</b> |
|                                                                                                                                                                                                                                    |              |              | <b>2.211</b> |

<sup>a</sup>(H) represents that the coordinated O was protonated. <sup>b</sup>(O<sub>t</sub>) means that the contraposition of coordinated O is terminal oxygen.

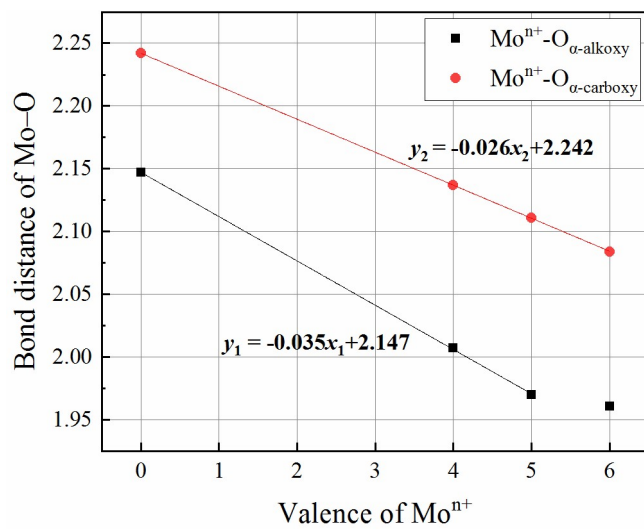

**Figure S1** Plot and linear fit of average Mo<sup>n+</sup>-O (α-alkoxy and α-carboxy) bond distances in molybdenum α-hydroxycarboxylates.



## References

- 1 J. Bergmann, E. Oksanen and U. Ryde, *J. Biol. Inorg. Chem.*, 2021, **26**, 341–353.
- 2 M. Takuma, Y. Ohki and K. Tatsumi, *Organometallics*, 2005, **24**, 1344–1347.
- 3 W. T. Jin and Z. H. Zhou, *Chin. Sci. Bull.*, 2020, **66**, 2702–2708.
- 4 S. Y. Wang, W. T. Jin, H. B. Chen and Z. H. Zhou, *Dalton Trans.*, 2018, **47**, 7412–7421.
- 5 M. N. Sokolov, S. A. Adonin, A. V. Virovets, P. A. Abramov, C. Vicent, R. Llusar and V. P. Fedin, *Inorg. Chim. Acta*, 2013, **395**, 11–18.
- 6 L. Deng, X. Dong, D. L. An, W. Z. Weng and Z. H. Zhou, *Inorg. Chem.*, 2020, **59**, 4874–4881.
- 7 S. Y. Wang and Z. H. Zhou, *RSC Adv.*, 2019, **9**, 519–528.
- 8 Y. H. Xing, J. Q. Xu, H. R. Sun, D. M. Li, Y. Xing, Y. H. Lin and H. Q. Jia, *Eur. J. Solid State Inorg. Chem.*, 1998, **35**, 745–756.
- 9 B. Modec and D. Dolenc, *Inorg. Chim. Acta*, 2019, **495**, 119006.
- 10 Z. H. Zhou, C. Y. Chen, Z. X. Cao, K. R. Tsai and Y. L. Chow, *Dalton Trans.*, 2008, DOI: 10.1039/B717452G, 2475–2479.
- 11 D. M. Li, Y. H. Xing, Z. C. Li, J. Q. Xu, W. B. Song, T. G. Wang, G. D. Yang, N. H. Hu, H. Q. Jia and H. M. Zhang, *J. Inorg. Biochem.*, 2005, **99**, 1602–1610.
- 12 J. Q. Xu, X. H. Zhou, L. M. Zhou, T. G. Wang, X. Y. Huang and B. A. Averill, *Inorg. Chim. Acta*, 1999, **285**, 152–154.
- 13 L. I. Dong, L. I. Ya, X. Yong, W. Ren, S. Hao, W. Tie, X. U. Ji, XING, L. Yong and J. Heng, *Chemical Research in Chinese Universities*, 2000, **21**, 1464–1467.
- 14 S. Y. Wang, J. W. Dai, H. B. Chen and Z. H. Zhou, *Inorg. Chim. Acta*, 2019, **490**, 173–178.
- 15 B. Modec, D. Dolenc and M. Kasunič, *Inorg. Chem.*, 2008, **47**, 3625–3633.
- 16 Z. H. Zhou, Y. F. Deng, Z. X. Cao, R. H. Zhang and Y. L. Chow, *Inorg. Chem.*, 2005, **44**, 6912–6914.
- 17 Z. H. Zhou, S. Y. Hou, Z. X. Cao, K. R. Tsai and Y. L. Chow, *Inorg. Chem.*, 2006, **45**, 8447–8451.
- 18 Z. H. Zhou, H. Wang, P. Yu, M. M. Olmstead and S. P. Cramer, *J. Inorg. Biochem.*, 2013, **118**, 100–106.
- 19 Z. H. Zhou, S. Y. Hou and H. L. Wan, *Dalton Trans.*, 2004, DOI: 10.1039/B315280D, 1393–1399.
- 20 L. R. Nassimbeni, M. L. Niven, J. J. Cruywagen and J. B. B. Heyns, *J. Crystallogr. Spectrosc. Res.*, 1987, **17**, 373–382.
- 21 Z. H. Zhou, H. L. Wan and K. R. Tsai, *Inorg. Chem.*, 2000, **39**, 59–64.
- 22 R. H. Zhang, X. W. Zhou, X. Dong and Z. H. Zhou, *J. Coord. Chem.*, 2017, **70**, 93–102.
- 23 R. H. Zhang, X. W. Zhou, Y. C. Guo, M. L. Chen, Z. X. Cao, Y. L. Chow and Z. H. Zhou, *Inorg. Chim. Acta*, 2013, **406**, 27–36.
- 24 Y. H. Xing, J. Q. Xu, H. R. Sun, D. M. Li, R. Z. Wang, T. G. Wang, W. M. Bu, L. Ye, G. D. Yang and Y. G. Fan, *Acta Crystallogr., Sect. C: Struct. Chem.*, 1998, **54**, 1615–1616.
- 25 X. H. Zhou, Y. H. Xing, J. Q. Xu, D. M. Li, R. Z. Wang, S. Q. Liu, Q. X. Zeng and X. Y. Huang, *Solid State Sci.*, 1999, **1**, 189–198.
- 26 Z. H. Zhou, H. L. Wan and K. R. Tsai, *Polyhedron*, 1997, **16**, 75–79.
- 27 Z. H. Zhou, H. L. Wan and K. R. Tsai, *J. Chem. Soc., Dalton Trans.*, 1999, 4289–4290.
- 28 A. le Roux, L. Dobrzańska, H. G. Raubenheimer and R. C. Luckay, *J. Mol. Struct.*, 2016, **1117**, 113–120.
- 29 M. A. Porai-Koshits, L. A. Aslanov, G. V. Ivanova and T. N. Polynova, *Zh. Strukt. Khim.*, 1968, **9**, 401–405.

- 30 C. B. Knobler, A. J. Wilson, R. N. Hider, I. W. Jensen, B. R. Penfold, W. T. Robinson and C. J. Wilkins, *J. Chem. Soc., Dalton Trans.*, 1983, 1299–1303.
- 31 R. H. Zhang, Z. H. Zhou and H. L. Wan, *Chin. J. Struct. Chem.*, 2008, **27**, 919–926.
- 32 Z. H. Zhou, W. B. Yan, H. L. Wan and K. R. Tsai, *J. Inorg. Biochem.*, 2002, **90**, 137–143.
- 33 J. E. Berg and P. E. Werner, *Z Kristallogr Cryst Mater*, 1977, **145**, 310–320.
- 34 Z. H. Zhou, W. B. Yan, H. L. Wan and K. R. Tsai, *Jiegou Huaxue*, 1995, **14**, 255–260.
- 35 Z. H. Zhou, S. Y. Hou, Z. X. Cao, H. L. Wan and S. W. Ng, *J. Inorg. Biochem.*, 2004, **98**, 1037–1044.
- 36 D. Bayot, B. Tinant and M. Devillers, *Inorg. Chim. Acta*, 2004, **357**, 809–816.
- 37 A. C. Dengel, W. P. Griffith, R. D. Powell and A. C. Skapski, *J. Chem. Soc., Dalton Trans.*, 1987, DOI: 10.1039/DT9870000991, 991–995.
